# Supplementary material for: Trichoderma reesei Rad51 tolerates mismatches in hybrid meiosis with diverse genome sequences
Source: PubMed Central journal article supplement — Proc Natl Acad Sci U S A. 2021 Feb 15;118(8):e2007192118. doi: 10.1073/pnas.2007192118 (PMC7923544; doi:10.1073/pnas.2007192118), 2021-02-15
Supplement: pnas.2007192118.sapp.pdf [file pnas.2007192118.sapp.pdf]

## Supporting Information Appendix

### ***Trichoderma reesei* Rad51 tolerates mismatches in hybrid meiosis with diverse genome sequences**

Wan-Chen Li<sup>1,2,3,#</sup>, Chia-Yi Lee<sup>4,#</sup>, Wei-Hsuan Lan<sup>5,#</sup>, Tai-Ting Woo<sup>3,#</sup>, Hou-Cheng Liu<sup>3</sup>, Hsin-Yi Yeh<sup>4</sup>, Hao-Yen Chang<sup>4</sup>, Yu-Chien Chuang<sup>3</sup>, Chiung-Ya Chen<sup>3</sup>, Chi-Ning Chuang<sup>3</sup>, Chia-Ling Chen<sup>3</sup>, Yi-Ping Hsueh<sup>3</sup>, Hung-Wen Li<sup>5\*</sup>, and Peter Chi<sup>4,6\*</sup> and Ting-Fang Wang<sup>1,3,\*</sup>

<sup>1</sup>Taiwan International Graduate Program in Molecular and Cellular Biology, Academia Sinica, Taipei 115, Taiwan

<sup>2</sup>Institute of Life Sciences, National Defense Medical Center, Taipei 115, Taiwan

<sup>3</sup>Institute of Molecular Biology, Academia Sinica, Taipei 115, Taiwan

<sup>4</sup>Institute of Biochemical Sciences, National Taiwan University, Taiwan

<sup>5</sup>Department of Chemistry, National Taiwan University, Taiwan

<sup>6</sup>Institute of Biological Chemistry, Academia Sinica, Taipei 115, Taiwan

#These authors contributed equally to this work.

\*Corresponding authors: HWL, email: hwli@ntu.edu.tw; PC, email: peterhchi@ntu.edu.tw; TFW, email: tfwang@gate.sinica.edu.tw

The supplemental information (SI) file includes "Materials and Method", 18 Supplemental Tables, 17 Supplemental Figures.

Two dataset files (Dataset S1 and Dataset S2) in Excel format are also provided separately.

## **MATERIALS AND METHODS**

### **Miscellaneous**

Fungal growth, culture media, sexual crossing, single ascospore isolation, preparation of genomic DNA, PCR genotyping, Southern hybridization, DAPI staining and cytological analysis have been described in our previous studies (1, 2). Whole genome sequencing and assembly were carried out according to the PacBio Single Molecule Real-Time (SMRT) method and the Illumina-NextSeq paired-end method (3). Asci were stained with DAPI (4',6-diamidino-2-phenylindole) and visualized using a DeltaVision Core Imaging System (Applied Precision, LLC, USA). In brief, developing or mature perithecia were dissected from the fruiting bodies under a dissection microscope and then soaked in 0.05% Triton™ X-100 with 0.5 µg/ml DAPI. The perithecia were ruptured using Dumont #5 tweezers to release rosettes of asci. Next, the rosettes of asci were carefully aspirated into a pipette tip and released onto a microscope slide for visualization. Fiji ImageJ software was used for image processing.

*Tr*Rad51 monoclonal antibodies were generated using the *Tr*Rad51 proteins (generated as described below) to immunize mice as previously described (4). Budding yeast genetic experiments were performed using S288c/SK1 hybrid diploid strains (5) kindly provided by Alain Nicolas (Institut Curie, CNRS, Paris, France) and Nancy Hollingsworth (Stony brook University, New York, USA). The rabbit anti-Hsp104 antisera were kindly provided by Chung Wang (Academia Sinica, Taiwan) and the goat anti-*Sc*Rad51 antiserum were purchased from Santa Cruz Biotechnology (California, USA).

### **Pulsed-field gel electrophoresis (PFGE)**

Intact chromosomal DNA was prepared using the agarose spheroplasting method with two modifications. The conidia were isolated and germinated in potato dextrose agar (PDA) at 25

°C, 200 rpm for 6 h before being embedded into the agarose plug. *Trichoderma harziaum* lysing enzymes (Sigma-Aldrich Co., St. Louis, MO) were used to digest the cell walls during spheroplasting. Electrophoresis conditions for karyotype analysis were described previously (6).

### **NGS-based APD calling and mapping of meiotic recombination products**

The genomic DNA was isolated from vegetative mycelia of QM6a, CBS999.97(*MAT1-1*), CBS999.97(*MAT1-2*), and the F1 progeny generated by sexually crossing QM6a and CBS999.97(*MAT1-1*), respectively. Next, three different methods were used to quantify and validate the quality of purified genomic DNA (gDNA): (1) NanoDrop 2000 (ThermoFisher Scientific, USA), (2) Qubit 3.0 fluorometer, and (3) Agilent 2200 TapeStation System. Next, the high-quality gDNA was subjected to whole genome sequencing using an Illumina-Miseq sequencer (3).

For variant calling, CLC Genomics Workbench 20.0 (<https://digitalinsights.qiagen.com>) was used to assemble all genome sequences. MUMmer4 (7) was utilized to genotype APD positions between the four representative F1 progeny relative to either one of the two parental genomes. The results were then analyzed using two publicly available programs [ReCombine (v2.1) (8) and GroupEvents (9)] to detect CO and NCO products. Genotype data were formatted as described previously (5) and the programs were run with a 0 bp threshold (i.e, without grouping closely spaced events). Next, PlotTetrad, a component of the “ReCombine” program (8), was used to create graphical representations of all seven chromosomes of QM6a and CBS999.97(*MAT1-1*).

### **SNP genotyping and recombination analysis**

We have developed a fungus-centric multiple genome sequence alignment (MGSA) tool named "TSETA" [Third-generation Sequencing (TGS) technology Enabled Tetrads Analysis], with two different functional modes: (1) the "SNP" mode is a powerful analytical tool for single-nucleotide-resolution comparisons of different intraspecies genomes; and (2) the "Tetrad" mode enables genome-wide identification of genetic variations before and after a single meiotic event, including meiotic recombination products, illegitimate mutations and repeat-induced point mutation (10, 11). The TSETA source code is publicly available on GitHub (<http://github.com/labASIMBTFWang/TSETA>) under the GPL-3.0 license.

### **Assembly of NGS-based genome sequences of 16 F1 progeny**

High-quality genomic DNA isolated from each of the 16 F1 progeny was sequenced using an Illumina-NextSeq PE150 system. The resulting *FASTQ* files were applied to the widely-used sequence aligner BWA-MEM (<https://arxiv.org/abs/1303.3997>; arXiv:1303.3997v2 [q-bio.GN]). using the PacBio genome sequences of the corresponding representative F1 progeny as templates for NGS-based genome assembly. The output SAM files were converted and sorted in SAMTOOLS (12) and then polished in PILON 1.23 (13) using the following commands (--genome reference.fasta, --frags sorted.bam, --fix snps, indels).

### **Expression plasmids and protein purification**

An improved SUMO fusion protein system (14) was used to produce and purify native *TrRad51* proteins in *E. coli*. The *ScRad51* cDNA was cloned into pLant2B vector (15). The *ScDmc1* cDNA was cloned into pNRB150 vector with a hexahistidine (His<sub>6</sub>) tag and a SUMO tag on the N-terminal (16).

The expression vector for *TrRad51* contained a His<sub>6</sub>-Smt3-N-terminal tag. The expression plasmid was transformed into the *E. coli* BLR pRAREpLysS strain, a *recA*<sup>-</sup> derivative of BL21

with pRARE to supply tRNAs for rare codons and pLysS to repress basal expression of target genes. The cells were incubated in Luria broth and harvested after 3 h of 1 mM IPTG induction at 37 °C. For protein purification, the cell paste was first suspended with breakage buffer (25 mM Tris-HCl pH 7.5, 10% glycerol, 500 mM KCl, 0.01% Igepal, 2 mM  $\beta$ -mercaptoethanol, 1 mM PMSF, and the protease inhibitors aprotinin, chymostatin, leupeptin, bestatin, and pepstatin A, each at 3  $\mu$ g/ml), sonicated, and centrifuged. *TrRad51* containing supernatant was fractionated in nickel-nitrilotriacetic acid agarose (QIAGEN), followed by on-column Ulp1 digestion, Source Q column (GE Healthcare), macro hydroxyapatite column (GE Healthcare), and Mono Q column (GE Healthcare) purifications. The *TrRad51*-containing fractions were pooled and concentrated with an Amicon Ultra-30kDa centrifugal filter. All steps were carried out at 4 °C to avoid protein degradation or loss of function, and the concentrated protein was stored at -80 °C.

To express *ScRad51*, the *recA*<sup>-</sup> *E.coli* BLR pRAREpLysS strain was used with 0.1 mM IPTG induction at 16 °C for 20 h. The purification process of His<sub>6</sub>-N-terminal-tagged *ScRad51* was modified from a previously described procedure (15). In brief, the supernatant of centrifuged cell lysate was precipitated by ammonium sulfate. The dissolved pellet was purified by consecutive chromatographic steps on Sepharose Q, macro hydroxyapatite, and Source Q columns. The expression and purification procedures for *ScDmc1* were conducted as previously described (17). Briefly, His<sub>6</sub>-N-terminal-tagged *ScDmc1* was expressed in *E. coli* Rosetta strain, induced by 1 mM Isopropyl  $\beta$ -d-1-thiogalactopyranoside (IPTG), and then harvested after 3 h incubation in 37 °C. For purification, all buffers contained 0.1 mM Na<sub>3</sub>VO<sub>4</sub>, 2 mM ATP and 2 mM MgCl<sub>2</sub>. *Dmc1* was purified through TALON affinity resin (Clontech), a HiTrap Heparin column (GE Healthcare), Ulp1 digestion, and a Mono Q column. The *ScRad51*- and *ScDmc1*-containing fractions were processed and stored as described for *TrRad51*.

## **DNA substrates**

All oligonucleotides without cyanine dyes were purchased from Genomics, whereas oligonucleotides with cyanine dye labels were obtained from Integrated Device Technology. Oligo concentrations were determined by UV absorption in TE buffer (10 mM Tris-HCl pH 8.0, 0.5 mM EDTA) and are reported in the manuscript as nucleotides/base pairs in molar concentration. In the ATPase assay and DNA mobility shift assay,  $\Phi$ x174 viral (+ sense) ssDNA or  $\Phi$ x174 linearized dsDNA was used to stimulate recombinase ATPase activity and binding of protein to DNA was then monitored. To visualize nucleoprotein filaments under electron microscopy, Oligo 1 (5'- TTATGTTTCAT TTTTATATC CTTTACTTTA TTTTCTCTGT TTATTCATTT ACTTATTTTG TATTATCCTT ATCTTATTTA, 80 mer) was mixed with protein.

For the isotope-labeled DNA strand exchange reaction, the ssDNA Oligo 1 was used to form nucleoprotein filament. To prepare the homologous 40-mer donor dsDNA, Oligo 2 (5'- TAATACAAA TAAGTAAATG AATAAACAGA GAAAATAAAG, 40 mer) was labeled with [ $\gamma$ -P<sup>32</sup>-ATP] (PerkinElmer) by polynucleotide kinase (New England Biolabs) at the 5' end. Unincorporated [ $\gamma$ -P<sup>32</sup>-ATP] was removed and then the radiolabeled oligonucleotide was annealed with its exact complementary ssDNA (Oligo 3). The dsDNA duplexes were formed by mixing the same amounts of complementary ssDNA in annealing buffer (50 mM Tris-HCl pH 7.5, 10 mM MgCl<sub>2</sub>, 100 mM NaCl, 1 mM DTT), and the mixtures were heated up to 85 °C for 3 min and gradually cooled down to room temperature for annealing. The annealed duplex DNA was purified from a 10% polyacrylamide gel and then concentrated for assay.

For D-loop assay, <sup>32</sup>P-labeled Oligo 4 (5'- AAATCAATCT AAAGTATATA TGAGTAAACT TGGTCTGACA GTTACCAATG CTTAATCAGT GAGGCACCTA TCTCAGCGAT CTGTCTATTT, 90 mer) and pBluescript supercoiled DNA was used in the

reaction. For fluorescence-based strand exchange, unlabeled Oligo 5 (5'- AAATGAACAT AAAGTAAATA AGTATAAGGA TAATACAAAA TAAGTAAATG AATAAACATA GAAAATAAAG TAAAGGATAT AAA, homologous ssDNA 83 mer) or Oligo 6 (5'- AAATGAACAT AAAGTAAATA AGTATAAGGA TAATGCAAAA TAAGTAAATG AATAAACATA GAAAATAAAG TAAAGGATAT AAA, mismatched ssDNA 83 mer) was used for nucleoprotein filament formation. For homologous donor dsDNA, the substrates were prepared by annealing two ssDNA, i.e., Oligo 7 (5' Cy3- AAATGAACAT AAAGTAAATA AGTATAAGGA TAATACAAAA, 40 mer) with its complementary 3'Cy5-fluorophore-labeled Oligo 8. The annealing steps were described as above.

For Single-Molecule triplex state stability experiments, 3'-biotinylated 5'-Cy5-labeled hybrid DNA was prepared by annealing unlabeled Oligo 9-11 (15-nt full homology, (**15 homo**, TGGCGACGGC AGCGAGGCTT AATTCATCTT CATTATCTCA GTTCTATCAA TCTTAATCTA ATACTCTTAC CTCCCTCCC TCTGTTTACT ATATTCTTA), 15-nt containing 1 mismatch (**15 mis**, TGGCGACGGC AGCGAGGCTT AATTCATCTTCA TTATCTCAGT TCTATCAATC TTAATCTAAT ACTCTTACCT TCCCACCCTC TGTTTACTATA TTCTTA) and 12-nt full homology (**12 homo**, TGGC GACGGC AGCGAGGCTT AATTCATCTT CATTATCTCA GTTCTATCAA TCTTAATCTA ATACTCTTAC CTCCCTCAT ACTGTTTACT ATATTCTTA)) with Oligo 12 (5'Cy5-GCCTCGCTGC CGTCGCCA-3'bio, 3'-biotinylated 5'-Cy5-labeled 18-nt ssDNA) at 1.2:1 ratio. To prepare Cy3-labeled 40-bp dsDNA, Oligo 13 (5'Cy3-TTCAGGGAGG GAAGGTAATT TTTGTTTTTT ATTTTTTTTT) and its complementary unlabeled Oligo 14 was annealed at 1:1.2 ratio.

### **ATPase assay**

All indicated concentrations for ATPase assays represent final concentrations, and all reactions were repeated three times. *Tr*Rad51 (2.5  $\mu$ M) was incubated in buffer A (35 mM Tris-HCl pH 7.5, 1 mM DTT, 50 mM KCl, 0.25 mM MgCl<sub>2</sub>, 0.1 mg/mL BSA, 1 mM ATP and 0.6  $\mu$ Ci [ $\gamma$ -P<sup>32</sup>-ATP]) with or without  $\Phi$ x174 viral (+ sense) ssDNA (37.5  $\mu$ M) or linearized dsDNA (37.5  $\mu$ M) at 37 °C for the indicated times. At each indicated time-point, 2  $\mu$ l of reaction mixture was mixed with an equal volume of 500 mM EDTA. ATPase activity was determined by thin-layer chromatography on a polyethyleneimine sheet (Sigma-Aldrich), with 0.15 M LiCl and 0.5 M formic acid as the developing buffer. The polyethyleneimine sheet was then air-dried and scanned with a phosphorimager (Bio-Rad).

#### **DNA mobility shift assay**

A fixed amount of  $\Phi$ x174 viral (+ sense) ssDNA (15  $\mu$ M) or  $\Phi$ x174 linearized dsDNA (15  $\mu$ M) was incubated with indicated amounts of *Tr*Rad51 in buffer B (35 mM Tris-HCl pH 7.5, 1 mM DTT, 50 mM KCl, 0.25 mM MgCl<sub>2</sub>, 1 mM ATP, and 0.1 mg/mL BSA) at 30 °C for 5 min. The reaction mixtures were separated by 1% agarose gel electrophoresis in TBE buffer (89 mM Tris-HCl pH 8.0, 89 mM Boric acid, 2 mM EDTA) at 4 °C. The gel was stained with SYB Gold Nucleic Acid Gel Stain (Invitrogen) and analyzed using a gel documentation station (Bio-Rad).

#### **Negative-staining electron microscopy**

Reaction mixtures were assembled with combinations of 0.8  $\mu$ M *Tr*Rad51 with 80-mer Oligo (2.4  $\mu$ M nucleotides) in 12.5  $\mu$ l of buffer B without BSA, with 10 mM CaCl<sub>2</sub>, at 30 °C. After 30 min incubation, 4  $\mu$ l of reaction was applied onto 400-mesh grids coated with fresh carbon film that had been glow-discharged. Samples were stained with 2% uranyl acetate for 1 min



and examined in a Hitach H-7100 transmission electron microscope operated at 75 keV in conjunction with a CCD camera at a nominal magnification (50,000 or 200,000X).

### **DNA strand-exchange assay**

All the reaction steps were carried out at 30 °C. The 80-mer Oligo 1 (4.8 μM) was incubated with the indicated amounts of *TrRad51* protein in buffer B, with or without 10 mM CaCl<sub>2</sub> for 5 min. Addition of <sup>32</sup>P-labeled 40-mer homologous duplex (2.4 μM) initiated the reaction, which lasted for 30 min unless indicated otherwise. A 5 μl aliquot was extracted and mixed with an equal volume of 0.1% SDS and 1 mg/ml proteinase K, before being incubated at 37 °C for 15 min. The reaction mixtures were separated with 10% polyacrylamide gels in TBE buffer at 4 °C. The gel was dried and scanned with a phosphorimager. For concentration titration, we used 0.8, 1.6, 2.4 and 4.8 μM of *TrRad51*. For time-course analysis, we executed a 5-, 10-, 15- and 30-min incubation after addition of dsDNA.

### **D-loop assay**

All reaction steps were carried out at 30 °C. The <sup>32</sup>P-labeled 90-mer Oligo 4 (2.4 μM) was pre-incubated with *TrRad51* in buffer B containing 10 mM CaCl<sub>2</sub> for 5 min, followed by addition of pBluescript dsDNA (37 μM) to initiate the D-loop reaction. After a 30-min incubation, a 5 μl aliquot was removed and mixed with an equal volume of 0.2% SDS and 0.8 mg/ml proteinase K, before incubation for 15 min. After electrophoresis in a 0.85 % agarose gel in TBE buffer, the gel was dried onto DE81 paper for visualization and quantification of the radiolabeled DNA species by phosphorimaging. For concentration titration, 0.2, 0.4, 0.8 and 1.6 μM of *TrRad51* were used. For time-course analysis, we executed a 5-, 10-, 15- and 30-min incubation after the addition of pBluescript dsDNA.

### Fluorescence-based strand exchange

Homologous Oligo 5 or mismatched Oligo 6 (3  $\mu$ M nucleotides) was first pre-incubated with recombinases (1  $\mu$ M) to assemble nucleoprotein complex in recombinase reaction buffer (buffer B containing 10 mM  $\text{CaCl}_2$  for *TrRad51*; buffer C for *ScRad51*: 35 mM Tris-HCl pH 7.5, 1 mM DTT, 15 mM KCl, 2.5 mM  $\text{MgCl}_2$ , 1 mM Spermine, 1 mM ATP, and 0.1 mg/mL BSA; buffer D for *ScDmc1*: 35 mM Tris-HCl pH 7.5, 1 mM DTT, 50 mM KCl, 2.5 mM  $\text{MgCl}_2$ , 0.5 mM  $\text{CaCl}_2$ , 1 mM ATP, and 0.1 mg/mL BSA) at 4 °C for 30 min. The addition of homologous dsDNA (Oligo 7+8; 1.45  $\mu$ M base pairs) initiated the strand exchange reaction. The reaction mixture was transferred into Falcon 384-well Black/Clear flat plates at room temperature, and then emission signal of Cy3 at 590 nm in the reaction mixture was detected using a BioTek SynergyHTX multi-mode reader every 2 min for 120 min.

In the reaction mixture undergoing DNA strand exchange, the two strands of donor dsDNA separate, causing an increase in Cy3 emission signal. The emission signal ( $F_t$ ) at 590 nm for each time-point was calculated using the following equation:  $F_t = (S_t - S_0) - (B_t - B_0)$  where “ $S_t$ ” is the fluorescence emission at 590 nm in the reaction containing recombinase at a given time-point, “ $B_t$ ” is the fluorescence emission at 590 nm in the reaction without recombinase at a given time-point, and “ $S_0$ ” and “ $B_0$ ” are the fluorescence emissions at 590 nm at the beginning of reactions with or without proteins, respectively. The emission signal is then normalized with the strongest signal in each group. Relative strand exchange efficiency ( $R_f$  shown as %) to represent mismatch tolerance is calculated using the following equation:  $R_f = F_M / F_H$  where “ $F_M$ ” is the 590 nm emission signal ( $F_t$ ) at the 120 min time-point of the reaction with mismatched substrates, and “ $F_H$ ” is the 590 nm emission signal of the reaction with homologous substrates at the 120 min time-point. The significance between mismatch tolerance of recombinases was analyzed with GraphPad Prism 7. The Shapiro-Wilk normality

test was performed to test if the data was normally distributed. All groups were compared using one-way ANOVA with Tukey's post hoc test.

### **Single-molecule triplex state stability experiments and data analysis**

The reaction was conducted by incubating 0.02 mg/mL streptavidin for 5 min on a PEGylated slide and coverslip, prepared as previously described (18). After washing away excess streptavidin using buffer F (20 mM Tris-HCl and 50 mM NaCl), the 3'-biotinylated Cy5-labeled hybrid DNA was immobilized on the streptavidin-coated surface for 5 min. Free hybrid DNA was flushed away using recombinase reaction buffer (as described in the section on Fluorescence-based strand exchange) in the presence of imaging buffer G components (4 mg/mL glucose, 30 U/mL glucose oxidase, 30 U/mL catalase, 1 mM dithiothreitol, and 1 mg/mL BSA). Then, the recombinase (1  $\mu$ M *TrRad51*, 1  $\mu$ M *ScRad51* or 2  $\mu$ M *ScDmc1*) with 2 mM ATP, 1 mM dithiothreitol and 1 mg/mL BSA in recombinase reaction buffer was incubated with surface-bound hybrid DNA for 15 min to form nucleoprotein filaments. After washing away excess recombinase, triplex state formation was initiated by introducing 10 nM Cy3-labeled 40 bp double-stranded DNA (representing either 15-nt full homology, 12-nt full homology or 15-nt with 1-nt mismatched sequence at the 11th position) into the reaction chamber for 20 min. On average, we observed approximately  $29.3 \pm 11.4$  Cy3-Cy5 co-localized spots (mean  $\pm$ S.D.). We controlled for surface density and scored co-localization solely within 6 pixels of the anchored Cy5-labeled strand so that specific co-localization was counted. Attempting to map the Cy3-labeled dsDNA spots onto a different and incorrect field-of-view of the Cy5-labeled anchored strands returned only  $\sim 2.7 \pm 0.6$  spots. Control experiments containing no recombinases returned only  $\sim 0.4 \pm 0.5$  co-localized spots, confirming that co-localized spots in our experiments are recombinase-mediated triplex states. Free Cy3-labeled

40 bp double-stranded DNA was then flushed away using imaging buffer G with 2 mM ATP, and this time-point was defined as time zero.

We utilized an objective-type total internal reflection fluorescence microscope (IX2; Olympus) equipped with 532-nm and 633-nm lasers to alternatively excite the Cy3 and Cy5 dyes. Mapping of the Cy3 and Cy5 imaging channels was achieved using mapping oligos containing annealed Cy3-labeled oligo and biotinylated Cy5-labeled oligo, respectively, based on a mapping algorithm written in MATLAB (19). The fluorescent signal was acquired by an electron-multiplying CCD system (ProEM 512B; Princeton Instruments) at 10 Hz for 20-frames (2-second) for 532-nm and 633-nm excitation each at given time-points using a dual-view system. Laser excitation was switched off between given time-points. Under the experimental conditions we used (including laser power and camera exposure time), less than 10% of Cy3 dyes photobleach after 60-sec continuous excitation. Image acquisition was achieved using a program written in LABVIEW 8.6. Automatic spot detection and colocalization analysis was performed using MATLAB. Data points shown are from at least three independent experiments and error bars represent standard error of the mean.

Table S1. List of all *Trichoderma reesei* strains analyzed by PacBio RSII or Illumina-NextSeq whole genome sequencing technology

| Strain                     | Description                                                       | Sequencing platform  | BioProject accession | WGS/SRA accession                    |
|----------------------------|-------------------------------------------------------------------|----------------------|----------------------|--------------------------------------|
| QM6a                       | wild type QM6a                                                    | PacBio RSII          | PRJNA325840          | CP016232-CP016238                    |
| CBS999.97( <i>MAT1-1</i> ) | Wild type ( <i>MAT1-1</i> )                                       | PacBio RSII          | PRJNA352653          | CP017983-CP017984, CP020875-CP020879 |
| CBS999.97( <i>MAT1-2</i> ) | Wild type ( <i>MAT1-2</i> )                                       | PacBio RSII          | PRJNA382020          | CP020724-CP020730                    |
| #1-1                       | The #1 ascospore in the #1 QM6a/CBS999.97( <i>MAT1-1</i> ) ascus  | ILLUMINA NextSeq 500 | PRJNA433292          | SRR6884669                           |
| #1-1                       | The #1 ascospore in the #1 QM6a/CBS999.97( <i>MAT1-1</i> ) ascus  | PacBio RSII          | PRJNA386077          | CP021290-CP021296                    |
| #1-2                       | The #2 ascospore in the #1 QM6a/CBS999.97( <i>MAT1-1</i> ) ascus  | ILLUMINA NextSeq 500 | PRJNA433292          | SRR6884668                           |
| #1-3                       | The #3 ascospore in the #1 QM6a/CBS999.97( <i>MAT1-1</i> ) ascus  | ILLUMINA NextSeq 500 | PRJNA433292          | SRR6884667                           |
| #1-3                       | The #3 ascospore in the #1 QM6a/CBS999.97( <i>MAT1-1</i> ) ascus  | PacBio RSII          | PRJNA386077          | CP021297-CP021303                    |
| #1-4                       | The #4 ascospore in the #1 QM6a/CBS999.97( <i>MAT1-1</i> ) ascus  | ILLUMINA NextSeq 500 | PRJNA433292          | SRR6884666                           |
| #1-5                       | The #5 ascospore in the #1 QM6a/CBS999.97( <i>MAT1-1</i> ) ascus  | ILLUMINA NextSeq 500 | PRJNA433292          | SRR6884673                           |
| #1-6                       | The #6 ascospore in the #1 QM6a/CBS999.97( <i>MAT1-1</i> ) ascus  | ILLUMINA NextSeq 500 | PRJNA433292          | SRR6884672                           |
| #1-7                       | The #7 ascospore in the #1 QM6a/CBS999.97( <i>MAT1-1</i> ) ascus  | ILLUMINA NextSeq 500 | PRJNA433292          | SRR6884671                           |
| #1-7                       | The #7 ascospore in the #1 QM6a/CBS999.97( <i>MAT1-1</i> ) ascus  | PacBio RSII          | PRJNA386077          | CP021304-CP021310                    |
| #1-8                       | The #8 ascospore in the #1 QM6a/CBS999.97( <i>MAT1-1</i> ) ascus  | ILLUMINA NextSeq 500 | PRJNA433292          | SRR6884670                           |
| #1-9                       | The #9 ascospore in the #1 QM6a/CBS999.97( <i>MAT1-1</i> ) ascus  | ILLUMINA NextSeq 500 | PRJNA433292          | SRR6884665                           |
| #1-10                      | The #10 ascospore in the #1 QM6a/CBS999.97( <i>MAT1-1</i> ) ascus | ILLUMINA NextSeq 500 | PRJNA433292          | SRR6884664                           |

|       |                                                          |                      |             |                   |
|-------|----------------------------------------------------------|----------------------|-------------|-------------------|
| #1-11 | The #11 ascospore in the #1 QM6a/CBS999.97(MAT1-1) ascus | ILLUMINA NextSeq 500 | PRJNA433292 | SRR6884649        |
| #1-11 | The #11 ascospore in the #1 QM6a/CBS999.97(MAT1-1) ascus | PacBio RSII          | PRJNA386077 | CP021311-CP021317 |
| #1-12 | The #12 ascospore in the #1 QM6a/CBS999.97(MAT1-1) ascus | ILLUMINA NextSeq 500 | PRJNA433292 | SRR6884648        |
| #1-13 | The #13 ascospore in the #1 QM6a/CBS999.97(MAT1-1) ascus | ILLUMINA NextSeq 500 | PRJNA433292 | SRR6884651        |
| #1-14 | The #14 ascospore in the #1 QM6a/CBS999.97(MAT1-1) ascus | ILLUMINA NextSeq 500 | PRJNA433292 | SRR6884650        |
| #1-15 | The #15 ascospore in the #1 QM6a/CBS999.97(MAT1-1) ascus | ILLUMINA NextSeq 500 | PRJNA433292 | SRR6884653        |
| #1-16 | The #16 ascospore in the #1 QM6a/CBS999.97(MAT1-1) ascus | ILLUMINA NextSeq 500 | PRJNA433292 | SRR6884652        |
| #2-1  | The #1 ascospore in the #2 QM6a/CBS999.97(MAT1-1) ascus  | ILLUMINA NextSeq 500 | PRJNA433292 | SRR6884655        |
| #2-5  | The #5 ascospore in the #2 QM6a/CBS999.97(MAT1-1) ascus  | ILLUMINA NextSeq 500 | PRJNA433292 | SRR6884654        |
| #2-9  | The #9 ascospore in the #2 QM6a/CBS999.97(MAT1-1) ascus  | ILLUMINA NextSeq 500 | PRJNA433292 | SRR6884647        |
| #2-13 | The #13 ascospore in the #2 QM6a/CBS999.97(MAT1-1) ascus | ILLUMINA NextSeq 500 | PRJNA433292 | SRR6884646        |
| #3-1  | The #1 ascospore in the #3 QM6a/CBS999.97(MAT1-1) ascus  | ILLUMINA NextSeq 500 | PRJNA433292 | SRR6884642        |
| #3-5  | The #5 ascospore in the #3 QM6a/CBS999.97(MAT1-1) ascus  | ILLUMINA NextSeq 500 | PRJNA433292 | SRR6884643        |
| #3-9  | The #9 ascospore in the #3 QM6a/CBS999.97(MAT1-1) ascus  | ILLUMINA NextSeq 500 | PRJNA433292 | SRR6884644        |
| #3-13 | The #13 ascospore in the #3 QM6a/CBS999.97(MAT1-1) ascus | ILLUMINA NextSeq 500 | PRJNA433292 | SRR6884645        |

Table S2. Summary of PacBio RSII sequencing and assembly results

| Strain                                   |                                                                         | QM6a <sup>1</sup>               | CBS999.97( <i>MATI-1</i> )      | CBS999.97( <i>MATI-2</i> )      |
|------------------------------------------|-------------------------------------------------------------------------|---------------------------------|---------------------------------|---------------------------------|
| Total sequenced bases                    |                                                                         | 3,397,762,180 bp                | 4,810,795,008 bp                | 6,202,644,396 bp                |
| Maximum of all assembled unitigs         |                                                                         | 6,835,650 bp                    | 6,822,671 bp                    | 6,835,650 bp                    |
| N <sub>50</sub> of all assembled unitigs |                                                                         | 5,311,312 bp                    | 5,258,125 bp                    | 5,262,578 bp                    |
| Number of reads                          |                                                                         | 263,312                         | 370,345                         | 636,376                         |
| N <sub>50</sub> reads                    |                                                                         | 18,236 bp                       | 18,599 bp                       | 14,406 bp                       |
| Phred Quality Score (Q) <sup>2</sup>     |                                                                         | 48.8                            | 48.1                            | 48.7                            |
| Unitigs                                  |                                                                         | 7 linear chromosomes            | 7 linear chromosomes            | 7 linear chromosomes            |
| Coverage                                 |                                                                         | 81X                             | 93X                             | 127X                            |
| Genome size                              |                                                                         | 34,922,528 bp                   | 34,319,199 bp                   | 34,324,311 bp                   |
| Unidentified bases (N)                   |                                                                         | 0 bp                            | 0 bp                            | 0 bp                            |
| GC content                               |                                                                         | 51.1%                           | 51.6%                           | 51.6%                           |
| Mitochondria genome (circular)           |                                                                         | 42139                           | 39004                           | 39004                           |
| BUSCO Metrics (Genome) <sup>3</sup>      | Total                                                                   | 100%                            | 98.5%                           | 98.4%                           |
|                                          | Single complete (S); Duplicated complete (D); Fragment (F); Missing (M) | S:100%; D:0.0%; F:0.0%; M:0.0%  | S:98.3%; D:0.2%; F:0.8%; M:0.7% | S:98.3%; D:0.1%; F:0.8%; M:0.8% |
| BUSCO metrics (Protein) <sup>4</sup>     | Total                                                                   | 96.8%                           | 98.8%                           | 98.3%                           |
|                                          | Single complete (S); Duplicated complete (D); Fragment (F); Missing (M) | S:96.6%; D:0.2%; F:3.0%; M:0.2% | S:98.6%; D:0.2%; F:0.9%; M:0.3% | S:98.1%; D:0.2%; F:1.3%; M:0.4% |

1. The nuclear and mitochondrial genome sequences was reported previously(3). The genome sequence and the original genome-wide annotation data are publicly available ([https://mycocosm.jgi.doe.gov/Trire\\_Chr/Trire\\_Chr.home.html](https://mycocosm.jgi.doe.gov/Trire_Chr/Trire_Chr.home.html)).
2. Phred Quality Score (Q) is a measure of the quality of the identification of the nucleotide sequences generated by automated DNA sequencing (20).
3. To quantitatively measure genome assembly completeness, we have applied BUSCO (<https://busco.ezlab.org>), an open-source software with a large selection of lineage-specific sets of Benchmarking Universal Single-Copy Orthologs(21).
4. Evolutionarily-informed expectations of gene content from near-universal single-copy orthologs is selected from OrthoDB (<https://www.orthodb.org>) (22).
5. The *Funannotate* v1.5.3 pipeline (23) was applied to (re)annotate the genome sequences of QM6a, CBS999.97(*MATI-1*) and CBS999.97(*MATI-2*) (this study). We then applied BUSCO(3) again to quantitatively measure annotation completeness based on the evolutionarily-informed expectations of gene content from near-universal single-copy orthologs from OrthoDB (22).

Table S3. Characteristics and assembly of the seven CBS999.97 chromosomes

| Strain            | Chromosome | Size (bp) | GC (%) <sup>1</sup> | N <sup>2</sup>               | Centromere <sup>3</sup>       | <sup>4</sup> Telomeric repeats |                 | L telomere + subtelomere <sup>5</sup> |
|-------------------|------------|-----------|---------------------|------------------------------|-------------------------------|--------------------------------|-----------------|---------------------------------------|
|                   |            |           |                     |                              |                               | L                              | R               | R telomere + subtelomere <sup>5</sup> |
| CBS999.97(MATI-I) | I          | 6,822,680 | 52.09               | 0                            | 3184500- 3359500<br>(~175 kb) | 12                             | 10              | 1-19500                               |
|                   |            |           |                     |                              |                               |                                |                 | 6812500-6822680                       |
|                   | II         | 5,559,498 | 52.40               | 0                            | 1892000-2063500<br>(~172 kb)  | 10                             | 10              | 1-4000                                |
|                   |            |           |                     |                              |                               |                                |                 | 5558500-5559498                       |
|                   | III        | 5,258,134 | 52.11               | 0                            | 1677500-1830500<br>(~153 kb)  | 13                             | 10              | 1-4000                                |
|                   |            |           |                     |                              |                               |                                |                 | 5256000-5258134                       |
|                   | IV         | 4,872,985 | 52.06               | 0                            | 1453500- 1617500<br>(~164 kb) | 13                             | 9               | 1-1500                                |
|                   |            |           |                     |                              |                               |                                |                 | 4842500-4872985                       |
|                   | V          | 4,096,940 | 51.81               | 0                            | 1102500-1259500<br>(~157 kb)  | 8                              | 13              | 1-17500                               |
| 4092500-4096940   |            |           |                     |                              |                               |                                |                 |                                       |
| VI                | 3,741,771  | 50.24     | 0                   | 1636500-1810000<br>(~174 kb) | --                            | 9                              | 1-32500         |                                       |
|                   |            |           |                     |                              |                               |                                | 3741000-3741771 |                                       |
| VII               | 3,967,191  | 49.80     | 0                   | 1858000-2018500<br>(~161 kb) | 12                            | 9                              | 1-30000         |                                       |
|                   |            |           |                     |                              |                               |                                | 3956000-3967191 |                                       |
| Overall           | 34,319,199 | 51.6      | 0                   | 1071500 bp                   | 68                            | 70                             | ~157 kb         |                                       |



|                   |            |           |       |                              |                               |    |                 |                 |
|-------------------|------------|-----------|-------|------------------------------|-------------------------------|----|-----------------|-----------------|
| CBS999.97(MATI-2) | I          | 6,822,679 | 52.09 | 0                            | 3184500- 3359500<br>(~175 kb) | 14 | 7               | 1-19500         |
|                   |            |           |       |                              |                               |    |                 | 6814000-6822679 |
|                   | II         | 6,061,978 | 52.37 | 0                            | 1892000-2063500<br>(~172 kb)  | 12 | 12              | 1-4000          |
|                   |            |           |       |                              |                               |    |                 | 6042500-6061978 |
|                   | III        | 5,262,578 | 52.11 | 0                            | 1677500-1830500<br>(~153 kb)  | 14 | 7               | 1-4000          |
|                   |            |           |       |                              |                               |    |                 | 5256000-5262578 |
|                   | IV         | 4,370,647 | 52.07 | 0                            | 1453500- 1617500<br>(~164 kb) | 8  | 13              | 1-1500          |
|                   |            |           |       |                              |                               |    |                 | 4369500-4370647 |
|                   | V          | 4,096,893 | 51.81 | 0                            | 1102500-1259500<br>(~157 kb)  | 10 | 7               | 1-17500         |
|                   |            |           |       |                              |                               |    |                 | 4092500-4096893 |
| VI                | 3,742,327  | 50.23     | 0     | 1637000-1810500<br>(~174 kb) | -                             | 13 | 1-33000         |                 |
|                   |            |           |       |                              |                               |    | 3741500-3742327 |                 |
| VII               | 3,927,209  | 49.80     | 0     | 1858000-2018500<br>(~161 kb) | 8                             | 14 | 1-30000         |                 |
|                   |            |           |       |                              |                               |    | 3956000-3967209 |                 |
| Overall           | 34,324,311 | 51.6      | 0     | 1153000 bp                   | 66                            | 73 | ~157 kb         |                 |

1. The EMBOSS geecee tool (<http://www.bioinformatics.nl/cgi-bin/emboss/geecee>) was used to calculate the fractional GC content using a 500 bp sliding window.
2. Number of unresolved bases (N).
3. Centromeres were manually identified as the longest AT-rich islands in each chromosome.
4. The telomeric repeats were identified as (TTAGGG)<sub>n</sub> at 3' termini and the complementary sequence (CCCTAA)<sub>n</sub> at 5' termini.
5. Subtelomeres were manually identified as the AT-rich island right next to the telomeric repeats.

Table S4. Transposable elements in QM6a(1), CBS999.97(*MAT1-1*) and CBS999.97(*MAT1-2*)

| Strain                      | Genome size (bp) | Repetitive sequences (bp) | Overall | Class I (retrotransposons) |                |                     |             |                   |                   |            | Class II (transposons) |            |                  |                    |                           |        |
|-----------------------------|------------------|---------------------------|---------|----------------------------|----------------|---------------------|-------------|-------------------|-------------------|------------|------------------------|------------|------------------|--------------------|---------------------------|--------|
|                             |                  |                           |         | <i>Tad1</i> -LINE          | <i>I</i> -LINE | <i>Jockey</i> -LINE | other LINES | <i>Copia</i> -LTR | <i>Gypsy</i> -LTR | other LTRs | <i>CMC-EnSpm</i>       | <i>hAT</i> | <i>MULE-MuDR</i> | <i>TcMar -FotI</i> | <i>PIF-Harbinger-like</i> | Others |
|                             |                  |                           |         | copy number                |                |                     |             |                   |                   |            |                        |            |                  |                    |                           |        |
| QM6a                        | 34922528         | 42035                     | 70      | 0                          | 0              | 4                   | 14          | 8                 | 10                | 4          | 6                      | 0          | 21               | 0                  | 0                         | 3      |
| CBS999.97 ( <i>MAT1-1</i> ) | 34319199         | 20756                     | 62      | 0                          | 0              | 11                  | 11          | 5                 | 2                 | 6          | 4                      | 1          | 17               | 0                  | 0                         | 5      |
| CBS999.97 ( <i>MAT1-2</i> ) | 34324311         | 20756                     | 62      | 0                          | 0              | 11                  | 11          | 5                 | 2                 | 6          | 4                      | 1          | 17               | 0                  | 0                         | 5      |

Table S5. Size distribution of AT-rich blocks in QM6a(3), CBS999.97(*MATI-1*) and CBS999.97(*MATI-2*)

| Strain                     | Genome (Mb) | Chromosome number | GC (%)      | Number of AT-rich blocks of different lengths (L in kb) <sup>1</sup> |                |                |                 |                  |                  |                  |                   |           |       |
|----------------------------|-------------|-------------------|-------------|----------------------------------------------------------------------|----------------|----------------|-----------------|------------------|------------------|------------------|-------------------|-----------|-------|
|                            |             |                   |             | $0.5 \leq L < 1$                                                     | $1 \leq L < 3$ | $3 \leq L < 5$ | $5 \leq L < 10$ | $10 \leq L < 15$ | $15 \leq L < 20$ | $20 \leq L < 50$ | $50 \leq L < 100$ | $L > 100$ | Total |
| QM6a                       | 34.9        | 7                 | 51.1 ± 11.6 | 1845                                                                 | 337            | 69             | 38              | 26               | 13               | 9                | 6                 | 6         | 2249  |
| CBS999.97( <i>MATI-1</i> ) | 34.3        | 7                 | 51.6 ± 10.7 | 1861                                                                 | 272            | 51             | 23              | 20               | 10               | 10               | 7                 | 5         | 2259  |
| CBS999.97( <i>MATI-2</i> ) | 34.3        | 7                 | 51.6 ± 10.8 | 1826                                                                 | 301            | 50             | 21              | 20               | 9                | 10               | 8                 | 5         | 2250  |

1. AT-rich interspersed islands were identified by their AT contents being  $\geq 6\%$  higher than that of average DNA in each fungal genome.

Table S6. APDs between QM6a and CBS999.97(*MAT1-I*)

| Chromosome | MUMmer4 |        |        | TSETA (SNP mode) |         |         |
|------------|---------|--------|--------|------------------|---------|---------|
|            | APDs    | SNPs   | InDels | APDs             | SNPs    | InDels  |
| I          | 188729  | 120810 | 67919  | 928283           | 231152  | 697131  |
| II         | 159995  | 102547 | 57448  | 1254388          | 172968  | 1081420 |
| III        | 136910  | 88503  | 48407  | 622873           | 157654  | 465219  |
| IV         | 122867  | 78085  | 44782  | 1120822          | 131911  | 988911  |
| V          | 115253  | 72582  | 42671  | 565759           | 164166  | 401593  |
| VI         | 104773  | 70501  | 34272  | 968639           | 132073  | 836566  |
| VII        | 107472  | 71550  | 35922  | 697216           | 148655  | 548561  |
| Genome     | 935999  | 604578 | 331421 | 6157980          | 1138579 | 5019401 |

Table S7. APDs between QM6a and CBS999.97(*MAT1-2*)

| Chromosome | APDs   | SNPs   | InDels |
|------------|--------|--------|--------|
| I          | 188658 | 120800 | 67858  |
| II         | 173152 | 110865 | 62287  |
| III        | 136994 | 88518  | 48476  |
| IV         | 123284 | 78370  | 44914  |
| V          | 115260 | 72579  | 42681  |
| VI         | 104620 | 70258  | 34362  |
| VII        | 107480 | 71557  | 35923  |
| Genome     | 949448 | 612947 | 336501 |

Table S8. APDs between CBS999.97(*MAT1-1*) and CBS999.97(*MAT1-2*)

| Chromosome | APDs | SNPs | InDels |
|------------|------|------|--------|
| I          | 404  | 73   | 331    |
| II         | 325  | 116  | 209    |
| III        | 616  | 301  | 315    |
| IV         | 265  | 43   | 222    |
| V          | 271  | 79   | 192    |
| VI         | 474  | 147  | 327    |
| VII        | 350  | 180  | 170    |
| Genome     | 2705 | 939  | 1766   |

Table S9A. Application of the NGS-based approach to detect the CO products generated by QM6a and CBS999.97(*MAT1-I*) hybrid meiosis

| Asci number | Chromosome number | Chromatids | APD_start_out | APD_start_in | APD_end_in | APD_end_out | Position of CO <sup>1</sup> | GC tract associated with CO | GC tract length <sup>2</sup> (bp) | CO length (bp) | snpmarker in GC | snp number in GC of TSETA | #snp / GC length |
|-------------|-------------------|------------|---------------|--------------|------------|-------------|-----------------------------|-----------------------------|-----------------------------------|----------------|-----------------|---------------------------|------------------|
| 1           | 1                 | [1,4]      | 290360        | 290417       | 290660     | 290742      | 290545                      | yes                         | 313                               | 313            | 5               | 5                         | 0.016            |
| 1           | 1                 | [1,4]      | 1376466       | 1376630      | 1376220    | 1376316     | 1376408                     | yes                         | 280                               | 280            | 3               | 5                         | 0.018            |
| 1           | 1                 | [3,4]      | 2846520       | 2846712      | 2846520    | 2846712     | 2846616                     | no                          | 0                                 | 192            | 0               | 0                         | -                |
| 1           | 1                 | [1,3]      | 4850040       | 4850203      | 4850040    | 4850203     | 4850122                     | no                          | 0                                 | 163            | 0               | 0                         | -                |
| 1           | 1                 | [2,4]      | 5942600       | 5942621      | 5942621    | 5942690     | 5942633                     | yes                         | 45                                | 45             | 1               | 1                         | 0.022            |
| 1           | 2                 | [3,4]      | 1078135       | 1078229      | 1078313    | 1078580     | 1078314                     | yes                         | 265                               | 265            | 5               | 5                         | 0.019            |
| 1           | 2                 | [1,2]      | 3067988       | 3068061      | 3067677    | 3067793     | 3067880                     | yes                         | 290                               | 290            | 6               | 6                         | 0.021            |
| 1           | 2                 | [1,2]      | 4581140       | 4581413      | 4581140    | 4581413     | 4581277                     | no                          | 0                                 | 273            | 0               | 0                         | -                |
| 1           | 3                 | [1,4]      | 389234        | 389285       | 389129     | 389234      | 389221                      | yes                         | 78                                | 78             | 1               | 1                         | 0.013            |
| 1           | 3                 | [2,4]      | 1639259       | 1639497      | 1639199    | 1639259     | 1639304                     | yes                         | 149                               | 149            | 1               | 1                         | 0.007            |
| 1           | 3                 | [1,3]      | 2230660       | 2231098      | 2230660    | 2231098     | 2230879                     | no                          | 0                                 | 438            | 0               | 0                         | -                |
| 1           | 4                 | [1,3]      | 823701        | 823776       | 823701     | 823776      | 823739                      | no                          | 0                                 | 75             | 0               | 0                         | -                |
| 1           | 4                 | [1,2]      | 1922088       | 1922223      | 1921803    | 1921929     | 1922011                     | yes                         | 290                               | 290            | 6               | 6                         | 0.021            |
| 1           | 4                 | [1,2]      | 3937229       | 3937528      | 3937528    | 3937598     | 3937471                     | yes                         | 185                               | 185            | 1               | 1                         | 0.005            |
| 1           | 5                 | [3,4]      | 906203        | 906347       | 906347     | 906371      | 906317                      | yes                         | 84                                | 84             | 1               | 1                         | 0.012            |
| 1           | 5                 | [3,4]      | 1651260       | 1651328      | 1651328    | 1651483     | 1651350                     | yes                         | 112                               | 112            | 1               | 2                         | 0.018            |
| 1           | 5                 | [2,3]      | 2640809       | 2641088      | 2640737    | 2640809     | 2640861                     | yes                         | 176                               | 176            | 1               | 1                         | 0.006            |
| 1           | 5                 | [1,3]      | 3964850       | 3965199      | 3964850    | 3965199     | 3965025                     | no                          | 0                                 | 349            | 0               | 0                         | -                |
| 1           | 6                 | [1,2]      | 640643        | 640693       | 640864     | 641090      | 640823                      | yes                         | 309                               | 309            | 6               | 6                         | 0.019            |

|   |   |       |         |         |         |         |         |     |     |     |    |    |       |
|---|---|-------|---------|---------|---------|---------|---------|-----|-----|-----|----|----|-------|
| 1 | 6 | [2,4] | 2245618 | 2246094 | 2245618 | 2246094 | 2245856 | no  | 0   | 476 | 0  | 0  | -     |
| 1 | 6 | [1,3] | 3265860 | 3266018 | 3266018 | 3266194 | 3266023 | yes | 167 | 167 | 1  | 1  | 0.006 |
| 1 | 7 | [3,4] | 1180585 | 1180958 | 1180585 | 1180958 | 1180772 | no  | 0   | 373 | 0  | 0  | -     |
| 1 | 7 | [1,2] | 2890900 | 2890971 | 2891551 | 2891642 | 2891266 | yes | 661 | 661 | 6  | 6  | 0.009 |
| 1 | 7 | [3,4] | 3411387 | 3411435 | 3411632 | 3411692 | 3411537 | yes | 251 | 251 | 15 | 15 | 0.060 |
| 2 | 1 | [1,2] | 442558  | 442580  | 442608  | 442895  | 442660  | yes | 183 | 183 | 3  | 3  | 0.016 |
| 2 | 1 | [1,2] | 1506474 | 1506720 | 1506745 | 1506803 | 1506686 | yes | 177 | 177 | 2  | 2  | 0.011 |
| 2 | 1 | [1,3] | 2084691 | 2084737 | 2084691 | 2084737 | 2084714 | no  | 0   | 46  | 0  | 0  | -     |
| 2 | 1 | [2,3] | 4251294 | 4251404 | 4251501 | 4251936 | 4251534 | yes | 370 | 370 | 3  | 3  | 0.008 |
| 2 | 1 | [1,2] | 5974725 | 5974980 | 5974725 | 5974980 | 5974853 | no  | 0   | 255 | 0  | 0  | -     |
| 2 | 2 | [2,4] | 1674268 | 1674949 | 1674268 | 1674949 | 1674609 | no  | 0   | 681 | 0  | 0  | -     |
| 2 | 2 | [2,4] | 3360922 | 3361041 | 3361146 | 3361272 | 3361095 | yes | 228 | 228 | 2  | 2  | 0.009 |
| 2 | 2 | [1,2] | 4300767 | 4301025 | 4300364 | 4300510 | 4300667 | yes | 459 | 459 | 8  | 8  | 0.017 |
| 2 | 2 | [2,3] | 5020085 | 5020184 | 5019921 | 5020071 | 5020065 | yes | 139 | 139 | 2  | 6  | 0.043 |
| 2 | 3 | [1,2] | 514260  | 514334  | 514359  | 514393  | 514337  | yes | 79  | 79  | 5  | 5  | 0.063 |
| 2 | 3 | [1,3] | 1423196 | 1423241 | 1423196 | 1423241 | 1423219 | no  | 0   | 45  | 0  | 0  | -     |
| 2 | 3 | [1,3] | 2307852 | 2308078 | 2307631 | 2307774 | 2307834 | yes | 263 | 263 | 3  | 3  | 0.011 |
| 2 | 3 | [3,4] | 3159300 | 3159525 | 3159300 | 3159525 | 3159413 | no  | 0   | 225 | 0  | 0  | -     |
| 2 | 4 | [2,4] | 575839  | 575922  | 575839  | 575922  | 575881  | no  | 0   | 83  | 0  | 0  | -     |
| 2 | 4 | [2,4] | 2627285 | 2627293 | 2627636 | 2627691 | 2627476 | yes | 375 | 375 | 9  | 14 | 0.037 |
| 2 | 4 | [2,4] | 4085711 | 4085902 | 4085543 | 4085711 | 4085717 | yes | 180 | 180 | 1  | 1  | 0.006 |
| 2 | 5 | [1,3] | 745152  | 745275  | 745152  | 745275  | 745214  | no  | 0   | 123 | 0  | 0  | -     |
| 2 | 5 | [1,3] | 1724856 | 1725224 | 1724856 | 1725224 | 1725040 | no  | 0   | 368 | 0  | 0  | -     |
| 2 | 5 | [1,2] | 3666820 | 3666825 | 3666742 | 3666820 | 3666802 | yes | 42  | 42  | 1  | 1  | 0.024 |
| 2 | 6 | [2,3] | 833048  | 833157  | 832423  | 832694  | 832831  | yes | 544 | 544 | 13 | 17 | 0.031 |
| 2 | 6 | [2,4] | 3013333 | 3013564 | 3012895 | 3012955 | 3013187 | yes | 524 | 524 | 6  | 41 | 0.078 |
| 2 | 7 | [2,3] | 1243420 | 1243724 | 1243241 | 1243413 | 1243450 | yes | 245 | 245 | 3  | 26 | 0.106 |



|   |   |       |         |         |         |         |         |     |       |       |     |      |       |
|---|---|-------|---------|---------|---------|---------|---------|-----|-------|-------|-----|------|-------|
| 2 | 7 | [2,3] | 2211545 | 2211672 | 2211545 | 2211672 | 2211609 | no  | 0     | 127   | 0   | 0    | -     |
| 2 | 7 | [3,4] | 3111332 | 3111536 | 3110921 | 3111076 | 3111216 | yes | 436   | 436   | 7   | 30   | 0.069 |
| 3 | 1 | [2,3] | 250116  | 250612  | 250965  | 251305  | 250750  | yes | 771   | 771   | 2   | 3    | 0.004 |
| 3 | 1 | [1,2] | 801334  | 801348  | 801334  | 801348  | 801341  | no  | 0     | 14    | 0   | 0    | -     |
| 3 | 1 | [1,3] | 2704304 | 2704336 | 2704501 | 2704569 | 2704428 | yes | 215   | 215   | 8   | 8    | 0.037 |
| 3 | 1 | [2,4] | 5831517 | 5831622 | 5831664 | 5831925 | 5831682 | yes | 225   | 225   | 3   | 3    | 0.013 |
| 3 | 2 | [1,3] | 422994  | 423160  | 423367  | 423632  | 423288  | yes | 423   | 423   | 4   | 4    | 0.009 |
| 3 | 2 | [2,3] | 1529079 | 1529171 | 1518542 | 1518568 | 1523840 | yes | 10570 | 10570 | 158 | 1590 | 0.150 |
| 3 | 2 | [2,3] | 1673723 | 1673857 | 1673488 | 1673564 | 1673658 | yes | 264   | 264   | 5   | 4    | 0.015 |
| 3 | 2 | [2,3] | 2537986 | 2538219 | 2537835 | 2537976 | 2538004 | yes | 197   | 197   | 2   | 2    | 0.010 |
| 3 | 2 | [2,3] | 3335826 | 3336217 | 3335826 | 3336217 | 3336022 | no  | 0     | 391   | 0   | 0    | -     |
| 3 | 2 | [2,3] | 5223023 | 5223642 | 5223023 | 5223642 | 5223333 | no  | 0     | 619   | 0   | 0    | -     |
| 3 | 3 | [1,2] | 537260  | 537458  | 537260  | 537458  | 537359  | no  | 0     | 198   | 0   | 0    | -     |
| 3 | 3 | [2,4] | 1395209 | 1395432 | 1395209 | 1395432 | 1395321 | no  | 0     | 223   | 0   | 0    | -     |
| 3 | 3 | [1,3] | 2086346 | 2086547 | 2085628 | 2085849 | 2086093 | yes | 708   | 708   | 7   | 7    | 0.010 |
| 3 | 4 | [1,4] | 557846  | 558182  | 557846  | 558182  | 558014  | no  | 0     | 336   | 0   | 0    | -     |
| 3 | 4 | [1,4] | 1902383 | 1902552 | 1901961 | 1902383 | 1902320 | yes | 296   | 296   | 1   | 1    | 0.003 |
| 3 | 4 | [1,2] | 2676737 | 2676891 | 2676737 | 2676891 | 2676814 | no  | 0     | 154   | 0   | 0    | -     |
| 3 | 4 | [1,2] | 3558403 | 3558505 | 3557186 | 3557217 | 3557828 | yes | 1253  | 1253  | 12  | 33   | 0.026 |
| 3 | 5 | [2,3] | 776022  | 776148  | 775763  | 775830  | 775941  | yes | 289   | 289   | 6   | 14   | 0.048 |
| 3 | 5 | [2,4] | 1672597 | 1672807 | 1672372 | 1672594 | 1672593 | yes | 219   | 219   | 2   | 21   | 0.096 |
| 3 | 5 | [1,3] | 2923773 | 2923934 | 2923997 | 2924060 | 2923941 | yes | 175   | 175   | 3   | 3    | 0.017 |
| 3 | 5 | [2,4] | 3952992 | 3953332 | 3952992 | 3953332 | 3953162 | no  | 0     | 340   | 0   | 0    | -     |
| 3 | 6 | [2,4] | 600880  | 600918  | 600933  | 601023  | 600939  | yes | 79    | 79    | 2   | 2    | 0.025 |
| 3 | 6 | [2,4] | 1444127 | 1444280 | 1444280 | 1444692 | 1444345 | yes | 283   | 283   | 1   | 9    | 0.032 |
| 3 | 6 | [2,4] | 2581058 | 2581227 | 2581227 | 2581576 | 2581272 | yes | 259   | 259   | 1   | 1    | 0.004 |
| 3 | 6 | [2,4] | 3091487 | 3091546 | 3090941 | 3091107 | 3091270 | yes | 493   | 493   | 7   | 25   | 0.051 |

|   |   |       |         |         |         |         |         |     |     |     |   |     |       |
|---|---|-------|---------|---------|---------|---------|---------|-----|-----|-----|---|-----|-------|
| 3 | 7 | [1,3] | 1092936 | 1093155 | 1092699 | 1092936 | 1092932 | yes | 228 | 228 | 1 | 1   | 0.004 |
| 3 | 7 | [2,3] | 3110158 | 3110271 | 3109955 | 3110158 | 3110136 | yes | 158 | 158 | 1 | 139 | 0.880 |

<sup>1</sup>Position was defined as the average of APD\_start\_out, APD\_start\_in, APD\_end\_in, APD\_end\_out

<sup>2</sup>GC tract length were the average of distances between (APD\_end\_out, APD\_start\_out) and the distance between (APD\_end\_in, APD\_end\_out)

Table S9B. Application of the NGS-based approach to detect the NCO products (with >2 3:1 and/or 4:0 markers) generated by QM6a and CBS999.97(*MATI-1*) hybrid meiosis

| Asci number | Chromosome number | Chromatids | APD_start_out | APD_start_in | APD_end_in | APD_end_out | Position of NCO | GC tract length (bp) | APD marker | NCO length |
|-------------|-------------------|------------|---------------|--------------|------------|-------------|-----------------|----------------------|------------|------------|
| 1           | 1                 | 4          | 2841732       | 2841773      | 2841798    | 2842041     | 2841836         | 167                  | 2          | 167        |
| 1           | 2                 | 1          | 1379241       | 1379363      | 1379405    | 1379528     | 1379384         | 164.5                | 3          | 165        |
| 1           | 3                 | 3          | 1308011       | 1308088      | 1308375    | 1308402     | 1308219         | 339                  | 22         | 339        |
| 1           | 3                 | 2          | 1581077       | 1581212      | 1581214    | 1581307     | 1581203         | 116                  | 2          | 116        |
| 1           | 3                 | 2          | 3934647       | 3934821      | 3935580    | 3935970     | 3935255         | 1041                 | 13         | 1041       |
| 1           | 3                 | 1          | 4101219       | 4101426      | 4101619    | 4101796     | 4101515         | 385                  | 9          | 385        |
| 1           | 5                 | 1          | 783355        | 783388       | 783475     | 783607      | 783456          | 169.5                | 2          | 170        |
| 1           | 5                 | 1          | 2906100       | 2906222      | 2906235    | 2906367     | 2906231         | 140                  | 3          | 140        |
| 1           | 6                 | 1          | 2041331       | 2042652      | 2042737    | 2042764     | 2042371         | 759                  | 2          | 759        |
| 2           | 1                 | 3          | 1369629       | 1370048      | 1370056    | 1370333     | 1370017         | 356                  | 2          | 356        |
| 2           | 1                 | 2          | 3651786       | 3651791      | 3651837    | 3651856     | 3651818         | 58                   | 3          | 58         |
| 2           | 1                 | 4          | 3712241       | 3712365      | 3712549    | 3712728     | 3712471         | 335.5                | 12         | 336        |
| 2           | 2                 | 1          | 1084839       | 1084945      | 1085158    | 1085167     | 1085027         | 270.5                | 8          | 271        |
| 2           | 2                 | 4          | 4571606       | 4571666      | 4571815    | 4571994     | 4571770         | 268.5                | 9          | 269        |
| 2           | 2                 | 3          | 5129211       | 5129412      | 5129467    | 5129695     | 5129446         | 269.5                | 5          | 270        |
| 2           | 3                 | 4          | 1577457       | 1577642      | 1577672    | 1577695     | 1577617         | 134                  | 2          | 134        |
| 2           | 3                 | 4          | 2103630       | 2103799      | 2103989    | 2104176     | 2103899         | 368                  | 11         | 368        |
| 2           | 3                 | 2          | 2431447       | 2431638      | 2432263    | 2432791     | 2432035         | 984.5                | 12         | 985        |
| 2           | 4                 | 2          | 1138845       | 1138905      | 1139077    | 1139160     | 1138997         | 243.5                | 21         | 244        |
| 2           | 4                 | 4          | 1724988       | 1725687      | 1726330    | 1726778     | 1725946         | 1216.5               | 5          | 1217       |

|   |   |   |         |         |         |         |         |        |     |      |
|---|---|---|---------|---------|---------|---------|---------|--------|-----|------|
| 2 | 6 | 1 | 1406831 | 1406962 | 1409630 | 1409834 | 1408314 | 2835.5 | 104 | 2836 |
| 2 | 7 | 1 | 2140902 | 2140949 | 2141212 | 2141509 | 2141143 | 435    | 6   | 435  |
| 3 | 1 | 3 | 1958151 | 1958389 | 1958402 | 1958440 | 1958346 | 151    | 4   | 151  |
| 3 | 1 | 4 | 250965  | 251305  | 258564  | 258641  | 254869  | 7467.5 | 190 | 7468 |
| 3 | 2 | 2 | 276341  | 276357  | 276394  | 276455  | 276387  | 75.5   | 3   | 76   |
| 3 | 2 | 4 | 1081240 | 1081282 | 1081314 | 1081467 | 1081326 | 129.5  | 3   | 130  |
| 3 | 2 | 3 | 1515769 | 1515902 | 1517414 | 1517551 | 1516659 | 1647   | 36  | 1647 |
| 3 | 2 | 1 | 4581140 | 4581413 | 4582518 | 4582923 | 4581999 | 1444   | 13  | 1444 |
| 3 | 3 | 1 | 2083858 | 2084158 | 2084730 | 2084855 | 2084400 | 784.5  | 32  | 785  |
| 3 | 3 | 1 | 2086583 | 2086838 | 2086932 | 2087078 | 2086858 | 294.5  | 2   | 295  |
| 3 | 3 | 1 | 4830502 | 4831120 | 4831818 | 4832061 | 4831375 | 1128.5 | 22  | 1129 |
| 3 | 5 | 2 | 162435  | 162635  | 166837  | 166915  | 164706  | 4341   | 54  | 4341 |
| 3 | 6 | 1 | 1263014 | 1263092 | 1263164 | 1263243 | 1263128 | 150.5  | 2   | 151  |
| 3 | 6 | 4 | 2581995 | 2582082 | 2582161 | 2582218 | 2582114 | 151    | 4   | 151  |
| 3 | 7 | 3 | 532552  | 532597  | 532612  | 532631  | 532598  | 47     | 2   | 47   |
| 3 | 7 | 3 | 714501  | 714627  | 714682  | 714777  | 714647  | 165.5  | 4   | 166  |
| 3 | 7 | 3 | 2432818 | 2433100 | 2433281 | 2433337 | 2433134 | 350    | 9   | 350  |

Table S10. TSETA outcompetes the NGS-based pipeline for detecting the NCO products in the first QM6a/CBS999.97(*MAT1-I*) ascus. Authentic NCOs are highlighted in yellow.

| Asci#1 |                        | TSETA         |                      |                 |               |              |            |             |                                       | NGS-based pipeline [MUMmer4 and Recombine (v1.2)] |                      |                 |               |              |            |             |
|--------|------------------------|---------------|----------------------|-----------------|---------------|--------------|------------|-------------|---------------------------------------|---------------------------------------------------|----------------------|-----------------|---------------|--------------|------------|-------------|
| chr#   | Chromosome Length (bp) | Position (bp) | GC tract length (bp) | GC tract marker | APD_start_out | APD_start_in | APD_end_in | APD_end_out | Remark                                | Position (bp)                                     | GC tract length (bp) | GC tract marker | APD_start_out | APD_start_in | APD_end_in | APD_end_out |
| 1      | 6835803                | 2841837       | 168                  | 6               | 2841732       | 2841773      | 2841800    | 2842041     | Authentic NCO                         | 2841836                                           | 167                  | 2               | 2841732       | 2841773      | 2841798    | 2842041     |
| 1      | 6835803                | 4349992       | 163                  | 5               | 4349909       | 4349911      | 4349918    | 4350228     | An Indel due to a poly-C and -G tract |                                                   |                      |                 |               |              |            |             |
| 2      | 6234656                | 1379384       | 166                  | 3               | 1379241       | 1379360      | 1379405    | 1379528     | Authentic NCO                         | 1379384                                           | 165                  | 3               | 1379241       | 1379363      | 1379405    | 1379528     |
| 2      | 6234656                | 4817690       | 68                   | 2               | 4817606       | 4817707      | 4817710    | 4817738     | An Indel due to a poly-G tract        |                                                   |                      |                 |               |              |            |             |
| 2      | 6234656                | 4955357       | 19                   | 5               | 4955339       | 4955355      | 4955360    | 4955372     | An Indel due to a poly-G tract        |                                                   |                      |                 |               |              |            |             |
| 3      | 5311445                | 1308219       | 339                  | 27              | 1308011       | 1308088      | 1308375    | 1308402     | Authentic NCO                         | 1308219                                           | 339                  | 22              | 1308011       | 1308088      | 1308375    | 1308402     |
| 3      | 5311445                | 1581203       | 116                  | 2               | 1581077       | 1581213      | 1581214    | 1581307     | Authentic NCO                         | 1581203                                           | 116                  | 2               | 1581077       | 1581212      | 1581214    | 1581307     |
| 3      | 5311445                | 2314738       | 11                   | 4               | 2314730       | 2314734      | 2314742    | 2314744     | An Indel due to a poly-A and -G tract |                                                   |                      |                 |               |              |            |             |
| 3      | 5311445                | 3935255       | 1041                 | 19              | 3934647       | 3934821      | 3935580    | 3935970     | Authentic NCO                         | 3935255                                           | 1041                 | 13              | 3934647       | 3934821      | 3935580    | 3935970     |
| 3      | 5311445                | 4101515       | 385                  | 9               | 4101219       | 4101426      | 4101619    | 4101796     | Authentic NCO                         | 4101515                                           | 385                  | 9               | 4101219       | 4101426      | 4101619    | 4101796     |
| 4      | 4556834                | 1363135       | 51                   | 3               | 1363073       | 1363147      | 1363155    | 1363166     | Authentic NCO                         |                                                   |                      |                 |               |              |            |             |
| 4      | 4556834                | 1790509       | 3                    | 2               | 1790506       | 1790509      | 1790510    | 1790511     | An Indel due to a poly-A and -C tract |                                                   |                      |                 |               |              |            |             |
| 4      | 4556834                | 1790513       | 3                    | 2               | 1790511       | 1790513      | 1790514    | 1790515     | An Indel due to a poly-A and -C tract |                                                   |                      |                 |               |              |            |             |

|   |         |         |     |   |         |         |         |         |                                       |         |     |   |         |         |         |         |
|---|---------|---------|-----|---|---------|---------|---------|---------|---------------------------------------|---------|-----|---|---------|---------|---------|---------|
| 4 | 4556834 | 3558827 | 9   | 3 | 3558820 | 3558825 | 3558831 | 3558832 | An Indel due to a poly-A and -C tract |         |     |   |         |         |         |         |
| 4 | 4556834 | 3558857 | 9   | 3 | 3558851 | 3558854 | 3558857 | 3558865 | An Indel due to a poly-A and -C tract |         |     |   |         |         |         |         |
| 4 | 4556834 | 3914233 | 5   | 2 | 3914230 | 3914232 | 3914235 | 3914236 | An Indel due to a poly-T tract        |         |     |   |         |         |         |         |
| 5 | 4159965 | 7       | 11  | 4 | 1       | 1       | 7       | 17      | telomere                              |         |     |   |         |         |         |         |
| 5 | 4159965 | 783456  | 170 | 2 | 783355  | 783388  | 783475  | 783607  | Authentic NCO                         | 783456  | 170 | 2 | 783355  | 783388  | 783475  | 783607  |
| 5 | 4159965 | 2906230 | 142 | 3 | 2906100 | 2906219 | 2906235 | 2906367 | Authentic NCO                         | 2906231 | 140 | 3 | 2906100 | 2906222 | 2906235 | 2906367 |
| 6 | 4000387 | 16382   | 33  | 3 | 16360   | 16371   | 16379   | 16417   | telomere                              |         |     |   |         |         |         |         |
| 6 | 4000387 | 2042371 | 759 | 2 | 2041331 | 2042652 | 2042737 | 2042764 | Authentic NCO                         | 2042371 | 759 | 2 | 2041331 | 2042652 | 2042737 | 2042764 |
| 6 | 4000387 | 2345006 | 171 | 2 | 2344776 | 2345065 | 2345066 | 2345116 | rDNA, An Indel due to a poly-G        |         |     |   |         |         |         |         |
| 6 | 4000387 | 2377073 | 99  | 2 | 2377012 | 2377035 | 2377040 | 2377205 | rDNA, An Indel due to a poly-G        |         |     |   |         |         |         |         |
| 6 | 4000387 | 2383990 | 146 | 2 | 2383772 | 2384061 | 2384062 | 2384063 | rDNA, An Indel due to a poly-G        |         |     |   |         |         |         |         |
| 6 | 4000387 | 3900903 | 85  | 2 | 3900794 | 3900927 | 3900944 | 3900946 | An Indel due to a poly-T tract        |         |     |   |         |         |         |         |
| 6 | 4000387 | 3901276 | 633 | 3 | 3900959 | 3900960 | 3900968 | 3902216 | An Indel due to a poly-T tract        |         |     |   |         |         |         |         |

Table S11. Comparison of the mitochondrial genome sequences of CBS999.97(*MATI-1*) and the 4 representative F1 progeny

| CBS999.97( <i>MATI-1</i> ) |     | #1-1      | #1-3      | #1-7      | #1-11     | InDel     |
|----------------------------|-----|-----------|-----------|-----------|-----------|-----------|
| 39,004 bp                  |     | 39,004 bp | 39,004 bp | 39,004 bp | 39,004 bp |           |
| 2613-2614                  | T-T | TGT       | TGT       | TGT       | TGT       | Insertion |
| 2632-2634                  | GAA | G-A       | G-A       | G-A       | G-A       | Deletion  |
| 2739-2741                  | GAA | G-A       | G-A       | G-A       | G-A       | Deletion  |
| 2801-2803                  | TAA | T-A       | T-A       | T-A       | T-A       | Deletion  |
| 4626-4627                  | T-A | TAA       | TAA       | TAA       | TAA       | Insertion |
| 14047-14048                | T-A | TAA       | TAA       | TAA       | TAA       | Insertion |

Table S12. List of genes in QM6a and CBS999.97(*MAT1-I*) mitochondrial genomes

| <i>T. reesei</i> QM6a                                                        |       |        |                                     | <i>T. reesei</i> CBS999.97( <i>MAT1-I</i> ) |       |        |                                   |
|------------------------------------------------------------------------------|-------|--------|-------------------------------------|---------------------------------------------|-------|--------|-----------------------------------|
| 42,139 bp                                                                    |       |        |                                     | 39,004 bp                                   |       |        |                                   |
| 27.2% GC content                                                             |       |        |                                     | 27.3% GC content                            |       |        |                                   |
| start                                                                        | end   | length | gene                                | start                                       | end   | length | gene                              |
| The membrane subunits of mitochondrial ATP synthases                         |       |        |                                     |                                             |       |        |                                   |
| 4162                                                                         | 4308  | 147    | atp8                                | 3361                                        | 3507  | 147    | atp8                              |
| 4470                                                                         | 5249  | 780    | atp6                                | 3656                                        | 4435  | 780    | atp6                              |
| 19805                                                                        | 19999 | 195    | atp9                                | 21928                                       | 22152 | 225    | atp9                              |
| The mitochondrial cytochrome b (cob) and cytochrome c oxidase I-III (cox1-3) |       |        |                                     |                                             |       |        |                                   |
| 28249                                                                        | 31792 | 3544   | cob<br>2 group I introns (ID, IB)   | 28089                                       | 31612 | 3524   | cob<br>2 group I introns (ID, IB) |
| 7684                                                                         | 8493  | 810    | cox3                                | 6873                                        | 7682  | 810    | cox3                              |
| 21304                                                                        | 24573 | 3270   | cox2<br>2 group I introns (IC2, ID) | 23752                                       | 24435 | 195    | cox2                              |
| 32470                                                                        | 41101 | 8632   | cox1<br>5 group I introns (5 IBs)   | 32292                                       | 36038 | 3747   | cox1<br>1 group I intron (IB)     |
| The membrane subunits of mitochondrial NADH dehydrogenase complex            |       |        |                                     |                                             |       |        |                                   |
| 882                                                                          | 2339  | 1458   | nad4                                | 13                                          | 1470  | 1458   | nad4                              |
| 8851                                                                         | 9603  | 753    | nad6                                | 8022                                        | 8774  | 753    | nad6                              |
| 17517                                                                        | 19184 | 1668   | nad2                                | 18350                                       | 20017 | 1668   | nad2                              |
| 19185                                                                        | 19598 | 414    | nad3                                | 21394                                       | 21720 | 327    | nad3                              |
| 24920                                                                        | 25189 | 270    | nad4L                               | 24764                                       | 25033 | 270    | nad4L                             |
| 25189                                                                        | 27267 | 2079   | nad5                                | 25033                                       | 27111 | 2079   | nad5                              |
| 41733                                                                        | 42128 | 396    | nad1                                | 36643                                       | 38843 | 2201   | nad1                              |
| The mitochondrial tRNA genes                                                 |       |        |                                     |                                             |       |        |                                   |
| 7209                                                                         | 7292  | 84     | tRNA Tyrosine                       | 6395                                        | 6478  | 84     | tRNA Tyrosine                     |
| 7399                                                                         | 7472  | 74     | tRNA Aspartate                      |                                             |       |        |                                   |
| 7478                                                                         | 7561  | 84     | tRNA Serine                         | 6667                                        | 6750  | 84     | tRNA Serine                       |
| 7566                                                                         | 7637  | 72     | tRNA Asparagine                     | 6755                                        | 6826  | 72     | tRNA Asparagine                   |
| 8611                                                                         | 8681  | 71     | tRNA Glycine                        | 7784                                        | 7854  | 71     | tRNA Glycine                      |



|                            |       |      |                    |       |       |      |                    |
|----------------------------|-------|------|--------------------|-------|-------|------|--------------------|
| 9979                       | 10050 | 72   | tRNA Isoleucine    | 9127  | 9198  | 72   | tRNA Isoleucine    |
| 10078                      | 10164 | 87   | tRNA Serine        | 9226  | 9312  | 87   | tRNA Serine        |
| 10170                      | 10241 | 72   | tRNA Tryptophan    | 9318  | 9389  | 72   | tRNA Tryptophan    |
| 10292                      | 10363 | 72   | tRNA Proline       | 9442  | 9513  | 72   | tRNA Proline       |
| 15197                      | 15267 | 71   | tRNA Threonine     | 15723 | 15793 | 71   | tRNA Threonine     |
| 15271                      | 15343 | 73   | tRNA Glutamate     |       |       |      |                    |
| 15344                      | 15414 | 71   | tRNA Methionine    | 15870 | 15940 | 71   | tRNA Methionine    |
| 15560                      | 15632 | 73   | tRNA Methionine    | 16086 | 16158 | 73   | tRNA Methionine    |
| 15637                      | 15719 | 83   | tRNA Leucine       | 16163 | 16245 | 83   | tRNA Leucine       |
| 15812                      | 15883 | 72   | tRNA Alanine       | 16339 | 16410 | 72   | tRNA Alanine       |
| 15889                      | 15961 | 73   | tRNA Phenylalanine | 16416 | 16488 | 73   | tRNA Phenylalanine |
| 15962                      | 16034 | 73   | tRNA Lysine        | 16489 | 16561 | 73   | tRNA Lysine        |
| 16112                      | 16195 | 84   | tRNA Leucine       | 16639 | 16722 | 84   | tRNA Leucine       |
| 16955                      | 17027 | 73   | tRNA Glutamine     | 17763 | 17835 | 73   | tRNA Glutamine     |
| 17201                      | 17274 | 74   | tRNA Histidine     | 18036 | 18109 | 74   | tRNA Histidine     |
| 17407                      | 17478 | 72   | tRNA Methionine    | 18240 | 18311 | 72   | tRNA Methionine    |
| 24695                      | 24765 | 71   | tRNA Arginine      | 24554 | 24624 | 71   | tRNA Arginine      |
| 31908                      | 31979 | 72   | tRNA Cysteine      | 31724 | 31795 | 72   | tRNA Cysteine      |
| 41217                      | 41287 | 71   | tRNA Arginine      | 36154 | 36224 | 71   | tRNA Arginine      |
| Open reading frames (orfs) |       |      |                    |       |       |      |                    |
| 2688                       | 3608  | 921  | orf306; LAGLIDADG  | 1812  | 2720  | 909  | orf302; LAGLIDADG  |
| 13113                      | 14531 | 1419 | orf472             | 10710 | 11504 | 795  | orf264; GIY        |
| 20363                      | 21067 | 705  | orf234; GIY        | 13665 | 14063 | 399  | orf132             |
| 21385                      | 22689 | 1305 | orf434; LAGLIDADG  | 14093 | 15052 | 960  | orf319             |
| 23017                      | 23835 | 819  | orf272             | 20018 | 21346 | 1329 | orf442             |
| 27575                      | 28021 | 447  | orf148             | 20021 | 21346 | 1326 | orf441; LAGLIDADG  |
| 28642                      | 29523 | 882  | orf293; GIY        | 22219 | 23715 | 1497 | orf498; LAGLIDADG  |
| 30070                      | 31032 | 963  | orf320; LAGLIDADG  | 27419 | 27865 | 447  | orf148             |
| 32863                      | 34020 | 1158 | orf385; LAGLIDADG  | 28482 | 29354 | 873  | orf290; GIY        |
| 34373                      | 35449 | 1077 | orf358; LAGLIDADG  | 29895 | 30857 | 963  | orf320; LAGLIDADG  |
| 35814                      | 36863 | 1050 | orf349; LAGLIDADG  | 33417 | 34493 | 1077 | orf358; LAGLIDADG  |

|                              |       |      |                          |       |       |      |                              |
|------------------------------|-------|------|--------------------------|-------|-------|------|------------------------------|
| 38478                        | 39548 | 1071 | orf356; LAGLIDADG        | 38040 | 38342 | 303  | orf100; GIY                  |
| The mitochondrial rRNA genes |       |      |                          |       |       |      |                              |
| 5659                         | 7167  | 1509 | small subunit rRNA (rns) | 4845  | 6351  | 1507 | small subunit rRNA (rns) rns |

Table S13. Variants among the 16 F1 progeny of ascus #1 (each genetically identical group is represented by a different color)

| #SNP<br>#InDel<br>#APD | #1-1 | #1-2 | #1-14 | #1-15 | #1-3    | #1-4    | #1-5    | #1-6    | #1-7    | #1-8    | #1-9    | #1-10   | #1-11   | #1-12   | #1-13   | #1-16   |         |
|------------------------|------|------|-------|-------|---------|---------|---------|---------|---------|---------|---------|---------|---------|---------|---------|---------|---------|
| #1-1                   |      | 27   | 25    | 20    | 713239  | 711284  | 713311  | 713312  | 711779  | 711780  | 711786  | 711786  | 563872  | 563868  | 563873  | 563866  |         |
|                        |      | 157  | 150   | 161   | 4345339 | 4354047 | 4345094 | 4345154 | 3854774 | 3854790 | 3854786 | 3854778 | 1888845 | 1888885 | 1888851 | 1888882 |         |
|                        |      | 184  | 175   | 181   | 5058578 | 5065331 | 5058405 | 5058466 | 4566553 | 4566570 | 4566572 | 4566564 | 2452717 | 2452753 | 2452724 | 2452748 |         |
| #1-2                   |      |      | 24    | 21    | 716404  | 714232  | 716424  | 716269  | 706440  | 706488  | 706447  | 706453  | 563940  | 563935  | 563941  | 563939  |         |
|                        |      |      | 137   | 134   | 4337562 | 4347574 | 4337407 | 4338677 | 3887097 | 3886929 | 3887101 | 3887097 | 1889132 | 1889168 | 1889138 | 1889165 |         |
|                        |      |      | 161   | 155   | 5053966 | 5061806 | 5053831 | 5054946 | 4593537 | 4593417 | 4593548 | 4593550 | 2453072 | 2453103 | 2453079 | 2453104 |         |
| #1-14                  |      |      |       | 17    | 703109  | 705607  | 705512  | 705528  | 709696  | 709696  | 709697  | 709708  | 564111  | 564112  | 564110  | 563962  |         |
|                        |      |      |       | 165   | 4363235 | 4349113 | 4349470 | 4349514 | 3850024 | 3850036 | 3850034 | 3850024 | 1888377 | 1888411 | 1888383 | 1889144 |         |
|                        |      |      |       | 182   | 5066344 | 5054720 | 5054982 | 5055042 | 4559720 | 4559732 | 4559731 | 4559732 | 2452488 | 2452523 | 2452493 | 2453106 |         |
| #1-15                  |      |      |       |       | 704879  | 705637  | 705569  | 705528  | 702416  | 702471  | 702420  | 702421  | 564109  | 564107  | 564112  | 563888  |         |
|                        |      |      |       |       | 4354740 | 4353492 | 4353839 | 4349497 | 3884007 | 3883799 | 3884019 | 3884011 | 1888334 | 1888372 | 1888338 | 1888909 |         |
|                        |      |      |       |       | 5059619 | 5059129 | 5059408 | 5055025 | 4586423 | 4586270 | 4586439 | 4586432 | 2452443 | 2452479 | 2452450 | 2452797 |         |
| #1-3                   |      |      |       |       |         | 31      | 42      | 34      | 564178  | 564177  | 564175  | 564185  | 707930  | 707796  | 709214  | 706959  |         |
|                        |      |      |       |       |         | 122     | 169     | 101     | 1952197 | 1952207 | 1952201 | 1952205 | 3809776 | 3805446 | 3805958 | 3815537 |         |
|                        |      |      |       |       |         | 153     | 211     | 135     | 2516375 | 2516384 | 2516376 | 2516390 | 4517706 | 4513242 | 4515172 | 4522496 |         |
| #1-4                   |      |      |       |       |         |         | 30      | 25      | 564189  | 564189  | 564189  | 564197  | 707550  | 707471  | 702557  | 706628  |         |
|                        |      |      |       |       |         |         | 111     | 47      | 1952329 | 1952339 | 1952331 | 1952335 | 3800448 | 3800470 | 3833228 | 3810569 |         |
|                        |      |      |       |       |         |         | 141     | 72      | 2516518 | 2516528 | 2516520 | 2516532 | 4507998 | 4507941 | 4535785 | 4517197 |         |
| #1-5                   |      |      |       |       |         |         |         | 30      | 564188  | 564187  | 564178  | 564186  | 706396  | 706314  | 705474  | 705469  |         |
|                        |      |      |       |       |         |         |         | 100     | 1952268 | 1952278 | 1952274 | 1952278 | 3805763 | 3805791 | 3815905 | 3815892 |         |
|                        |      |      |       |       |         |         |         | 130     | 2516456 | 2516465 | 2516452 | 2516464 | 4512159 | 4512105 | 4521379 | 4521361 |         |
| #1-6                   |      |      |       |       |         |         |         |         | 564195  | 564192  | 564183  | 564189  | 706232  | 710692  | 705310  | 709856  |         |
|                        |      |      |       |       |         |         |         |         | 1952264 | 1952274 | 1952268 | 1952272 | 3814419 | 3788273 | 3824559 | 3798292 |         |
|                        |      |      |       |       |         |         |         |         | 2516459 | 2516466 | 2516451 | 2516461 | 4520651 | 4498965 | 4529869 | 4508148 |         |
| #1-7                   |      |      |       |       |         |         |         |         |         | 9       | 18      | 17      | 698231  | 699161  | 700433  | 698252  |         |
|                        |      |      |       |       |         |         |         |         |         | 42      | 54      | 50      | 4480635 | 4469729 | 4466727 | 4480546 |         |
|                        |      |      |       |       |         |         |         |         |         | 51      | 72      | 67      | 5178866 | 5168890 | 5167160 | 5178798 |         |
| #1-8                   |      |      |       |       |         |         |         |         |         |         |         | 23      | 20      | 698239  | 699171  | 700443  | 698271  |
|                        |      |      |       |       |         |         |         |         |         |         |         | 58      | 46      | 4480631 | 4469725 | 4466723 | 4480542 |
|                        |      |      |       |       |         |         |         |         |         |         |         | 81      | 66      | 5178870 | 5168896 | 5167166 | 5178813 |
| #1-9                   |      |      |       |       |         |         |         |         |         |         |         |         | 13      | 698233  | 699165  | 700437  | 698253  |
|                        |      |      |       |       |         |         |         |         |         |         |         |         | 46      | 4480635 | 4469729 | 4466727 | 4480546 |
|                        |      |      |       |       |         |         |         |         |         |         |         |         | 59      | 5178868 | 5168894 | 5167164 | 5178799 |

|       |  |  |         |         |         |         |
|-------|--|--|---------|---------|---------|---------|
| #1-10 |  |  | 698234  | 699166  | 700438  | 698255  |
|       |  |  | 4480625 | 4469719 | 4466717 | 4480536 |
|       |  |  | 5178859 | 5168885 | 5167155 | 5178791 |
| #1-11 |  |  |         | 12      | 12      | 9       |
|       |  |  |         | 260     | 270     | 183     |
|       |  |  |         | 272     | 282     | 192     |
| #1-12 |  |  |         |         | 8       | 10      |
|       |  |  |         |         | 308     | 373     |
|       |  |  |         |         | 316     | 383     |
| #1-13 |  |  |         |         |         | 17      |
|       |  |  |         |         |         | 179     |
|       |  |  |         |         |         | 196     |
| #1-16 |  |  |         |         |         |         |

Table S14. Application of the NGS-based approach to detect the GC tract lengths in all CO and NCO products generated by QM6a/CBS999.97(*MATI-1*) hybrid meiosis

| CO/NCO | Ascus number | Chromosome number | chr_len | position (bp) | type     | GC tract length | APD_start_out | APD_start_in | APD_end_in | APD_end_out |
|--------|--------------|-------------------|---------|---------------|----------|-----------------|---------------|--------------|------------|-------------|
| CO     | 1            | 1                 | 6835803 | 290545        | CO w/ GC | 313             | 290360        | 290417       | 290660     | 290742      |
| CO     | 1            | 1                 | 6835803 | 1376408       | CO w/ GC | 280             | 1376466       | 1376630      | 1376220    | 1376316     |
| CO     | 1            | 1                 | 6835803 | 2846616       | CO       | 192             | 2846520       | 2846712      | 2846520    | 2846712     |
| CO     | 1            | 1                 | 6835803 | 4850122       | CO       | 163             | 4850040       | 4850203      | 4850040    | 4850203     |
| CO     | 1            | 1                 | 6835803 | 5942633       | CO w/ GC | 45              | 5942600       | 5942621      | 5942621    | 5942690     |
| CO     | 1            | 2                 | 6234656 | 1078314       | CO w/ GC | 265             | 1078135       | 1078229      | 1078313    | 1078580     |
| CO     | 1            | 2                 | 6234656 | 3067880       | CO w/ GC | 290             | 3067988       | 3068061      | 3067677    | 3067793     |
| CO     | 1            | 2                 | 6234656 | 4581277       | CO       | 273             | 4581140       | 4581413      | 4581140    | 4581413     |
| CO     | 1            | 3                 | 5311445 | 389221        | CO w/ GC | 78              | 389234        | 389285       | 389129     | 389234      |
| CO     | 1            | 3                 | 5311445 | 1639304       | CO w/ GC | 149             | 1639259       | 1639497      | 1639199    | 1639259     |
| CO     | 1            | 3                 | 5311445 | 2230879       | CO       | 438             | 2230660       | 2231098      | 2230660    | 2231098     |
| CO     | 1            | 4                 | 4556834 | 823739        | CO       | 75              | 823701        | 823776       | 823701     | 823776      |
| CO     | 1            | 4                 | 4556834 | 1922011       | CO w/ GC | 290             | 1922088       | 1922223      | 1921803    | 1921929     |
| CO     | 1            | 4                 | 4556834 | 3937471       | CO w/ GC | 185             | 3937229       | 3937528      | 3937528    | 3937598     |
| CO     | 1            | 5                 | 4159965 | 906317        | CO w/ GC | 84              | 906203        | 906347       | 906347     | 906371      |
| CO     | 1            | 5                 | 4159965 | 1651350       | CO w/ GC | 112             | 1651260       | 1651328      | 1651328    | 1651483     |
| CO     | 1            | 5                 | 4159965 | 2640861       | CO w/ GC | 176             | 2640809       | 2641088      | 2640737    | 2640809     |
| CO     | 1            | 5                 | 4159965 | 3965025       | CO       | 349             | 3964850       | 3965199      | 3964850    | 3965199     |
| CO     | 1            | 6                 | 4000387 | 640823        | CO w/ GC | 309             | 640643        | 640693       | 640864     | 641090      |
| CO     | 1            | 6                 | 4000387 | 2245856       | CO       | 476             | 2245618       | 2246094      | 2245618    | 2246094     |

|    |   |   |         |         |          |     |         |         |         |         |
|----|---|---|---------|---------|----------|-----|---------|---------|---------|---------|
| CO | 1 | 6 | 4000387 | 3266023 | CO w/ GC | 167 | 3265860 | 3266018 | 3266018 | 3266194 |
| CO | 1 | 7 | 3823438 | 1180772 | CO       | 373 | 1180585 | 1180958 | 1180585 | 1180958 |
| CO | 1 | 7 | 3823438 | 2891266 | CO w/ GC | 661 | 2890900 | 2890971 | 2891551 | 2891642 |
| CO | 1 | 7 | 3823438 | 3411537 | CO w/ GC | 251 | 3411387 | 3411435 | 3411632 | 3411692 |
| CO | 2 | 1 | 6835803 | 442660  | CO w/ GC | 183 | 442558  | 442580  | 442608  | 442895  |
| CO | 2 | 1 | 6835803 | 1506686 | CO w/ GC | 177 | 1506474 | 1506720 | 1506745 | 1506803 |
| CO | 2 | 1 | 6835803 | 2084714 | CO       | 46  | 2084691 | 2084737 | 2084691 | 2084737 |
| CO | 2 | 1 | 6835803 | 4251534 | CO w/ GC | 370 | 4251294 | 4251404 | 4251501 | 4251936 |
| CO | 2 | 1 | 6835803 | 5974853 | CO       | 255 | 5974725 | 5974980 | 5974725 | 5974980 |
| CO | 2 | 2 | 6234656 | 1674609 | CO       | 681 | 1674268 | 1674949 | 1674268 | 1674949 |
| CO | 2 | 2 | 6234656 | 3361095 | CO w/ GC | 228 | 3360922 | 3361041 | 3361146 | 3361272 |
| CO | 2 | 2 | 6234656 | 4300667 | CO w/ GC | 459 | 4300767 | 4301025 | 4300364 | 4300510 |
| CO | 2 | 2 | 6234656 | 5020065 | CO w/ GC | 139 | 5020085 | 5020184 | 5019921 | 5020071 |
| CO | 2 | 3 | 5311445 | 514337  | CO w/ GC | 79  | 514260  | 514334  | 514359  | 514393  |
| CO | 2 | 3 | 5311445 | 1423219 | CO       | 45  | 1423196 | 1423241 | 1423196 | 1423241 |
| CO | 2 | 3 | 5311445 | 2307834 | CO w/ GC | 263 | 2307852 | 2308078 | 2307631 | 2307774 |
| CO | 2 | 3 | 5311445 | 3159413 | CO       | 225 | 3159300 | 3159525 | 3159300 | 3159525 |
| CO | 2 | 4 | 4556834 | 575881  | CO       | 83  | 575839  | 575922  | 575839  | 575922  |
| CO | 2 | 4 | 4556834 | 2627476 | CO w/ GC | 375 | 2627285 | 2627293 | 2627636 | 2627691 |
| CO | 2 | 4 | 4556834 | 4085717 | CO w/ GC | 180 | 4085711 | 4085902 | 4085543 | 4085711 |
| CO | 2 | 5 | 4159965 | 745214  | CO       | 123 | 745152  | 745275  | 745152  | 745275  |
| CO | 2 | 5 | 4159965 | 1725040 | CO       | 368 | 1724856 | 1725224 | 1724856 | 1725224 |
| CO | 2 | 5 | 4159965 | 3666802 | CO w/ GC | 42  | 3666820 | 3666825 | 3666742 | 3666820 |
| CO | 2 | 6 | 4000387 | 832831  | CO w/ GC | 544 | 833048  | 833157  | 832423  | 832694  |
| CO | 2 | 6 | 4000387 | 3013187 | CO w/ GC | 524 | 3013333 | 3013564 | 3012895 | 3012955 |
| CO | 2 | 7 | 3823438 | 1243450 | CO w/ GC | 245 | 1243420 | 1243724 | 1243241 | 1243413 |

|    |   |   |         |         |          |       |         |         |         |         |
|----|---|---|---------|---------|----------|-------|---------|---------|---------|---------|
| CO | 2 | 7 | 3823438 | 2211609 | CO       | 127   | 2211545 | 2211672 | 2211545 | 2211672 |
| CO | 2 | 7 | 3823438 | 3111216 | CO w/ GC | 436   | 3111332 | 3111536 | 3110921 | 3111076 |
| CO | 3 | 1 | 6835803 | 250750  | CO w/ GC | 771   | 250116  | 250612  | 250965  | 251305  |
| CO | 3 | 1 | 6835803 | 801341  | CO       | 14    | 801334  | 801348  | 801334  | 801348  |
| CO | 3 | 1 | 6835803 | 2704428 | CO w/ GC | 215   | 2704304 | 2704336 | 2704501 | 2704569 |
| CO | 3 | 1 | 6835803 | 5831682 | CO w/ GC | 225   | 5831517 | 5831622 | 5831664 | 5831925 |
| CO | 3 | 2 | 6234656 | 423288  | CO w/ GC | 423   | 422994  | 423160  | 423367  | 423632  |
| CO | 3 | 2 | 6234656 | 1523840 | CO w/ GC | 10570 | 1529079 | 1529171 | 1518542 | 1518568 |
| CO | 3 | 2 | 6234656 | 1673658 | CO w/ GC | 264   | 1673723 | 1673857 | 1673488 | 1673564 |
| CO | 3 | 2 | 6234656 | 2538004 | CO w/ GC | 197   | 2537986 | 2538219 | 2537835 | 2537976 |
| CO | 3 | 2 | 6234656 | 3336022 | CO       | 391   | 3335826 | 3336217 | 3335826 | 3336217 |
| CO | 3 | 2 | 6234656 | 5223333 | CO       | 619   | 5223023 | 5223642 | 5223023 | 5223642 |
| CO | 3 | 3 | 5311445 | 537359  | CO       | 198   | 537260  | 537458  | 537260  | 537458  |
| CO | 3 | 3 | 5311445 | 1395321 | CO       | 223   | 1395209 | 1395432 | 1395209 | 1395432 |
| CO | 3 | 3 | 5311445 | 2086093 | CO w/ GC | 708   | 2086346 | 2086547 | 2085628 | 2085849 |
| CO | 3 | 4 | 4556834 | 558014  | CO       | 336   | 557846  | 558182  | 557846  | 558182  |
| CO | 3 | 4 | 4556834 | 1902320 | CO w/ GC | 296   | 1902383 | 1902552 | 1901961 | 1902383 |
| CO | 3 | 4 | 4556834 | 2676814 | CO       | 154   | 2676737 | 2676891 | 2676737 | 2676891 |
| CO | 3 | 4 | 4556834 | 3557828 | CO w/ GC | 1253  | 3558403 | 3558505 | 3557186 | 3557217 |
| CO | 3 | 5 | 4159965 | 775941  | CO w/ GC | 289   | 776022  | 776148  | 775763  | 775830  |
| CO | 3 | 5 | 4159965 | 1672593 | CO w/ GC | 219   | 1672597 | 1672807 | 1672372 | 1672594 |
| CO | 3 | 5 | 4159965 | 2923941 | CO w/ GC | 175   | 2923773 | 2923934 | 2923997 | 2924060 |
| CO | 3 | 5 | 4159965 | 3953162 | CO       | 340   | 3952992 | 3953332 | 3952992 | 3953332 |
| CO | 3 | 6 | 4000387 | 600939  | CO w/ GC | 79    | 600880  | 600918  | 600933  | 601023  |
| CO | 3 | 6 | 4000387 | 1444345 | CO w/ GC | 283   | 1444127 | 1444280 | 1444280 | 1444692 |
| CO | 3 | 6 | 4000387 | 2581272 | CO w/ GC | 259   | 2581058 | 2581227 | 2581227 | 2581576 |

|     |   |   |         |         |          |      |         |         |         |         |
|-----|---|---|---------|---------|----------|------|---------|---------|---------|---------|
| CO  | 3 | 6 | 4000387 | 3091270 | CO w/ GC | 493  | 3091487 | 3091546 | 3090941 | 3091107 |
| CO  | 3 | 7 | 3823438 | 1092932 | CO w/ GC | 228  | 1092936 | 1093155 | 1092699 | 1092936 |
| CO  | 3 | 7 | 3823438 | 3110136 | CO w/ GC | 158  | 3110158 | 3110271 | 3109955 | 3110158 |
| NCO | 1 | 1 | 6835803 | 2841836 | NCO      | 167  | 2841732 | 2841773 | 2841798 | 2842041 |
| NCO | 1 | 2 | 6835803 | 1379384 | NCO      | 165  | 1379241 | 1379363 | 1379405 | 1379528 |
| NCO | 1 | 3 | 5311445 | 1308219 | NCO      | 339  | 1308011 | 1308088 | 1308375 | 1308402 |
| NCO | 1 | 3 | 5311445 | 1581203 | NCO      | 116  | 1581077 | 1581212 | 1581214 | 1581307 |
| NCO | 1 | 3 | 5311445 | 3935255 | NCO      | 1041 | 3934647 | 3934821 | 3935580 | 3935970 |
| NCO | 1 | 3 | 5311445 | 4101515 | NCO      | 385  | 4101219 | 4101426 | 4101619 | 4101796 |
| NCO | 1 | 5 | 4159965 | 783456  | NCO      | 170  | 783355  | 783388  | 783475  | 783607  |
| NCO | 1 | 5 | 4159965 | 2906231 | NCO      | 140  | 2906100 | 2906222 | 2906235 | 2906367 |
| NCO | 1 | 6 | 4000387 | 2042371 | NCO      | 759  | 2041331 | 2042652 | 2042737 | 2042764 |
| NCO | 2 | 1 | 6835803 | 1370017 | NCO      | 356  | 1369629 | 1370048 | 1370056 | 1370333 |
| NCO | 2 | 1 | 6835803 | 3651818 | NCO      | 58   | 3651786 | 3651791 | 3651837 | 3651856 |
| NCO | 2 | 1 | 6835803 | 3712471 | NCO      | 336  | 3712241 | 3712365 | 3712549 | 3712728 |
| NCO | 2 | 2 | 6234656 | 1085027 | NCO      | 271  | 1084839 | 1084945 | 1085158 | 1085167 |
| NCO | 2 | 2 | 6234656 | 4571770 | NCO      | 269  | 4571606 | 4571666 | 4571815 | 4571994 |
| NCO | 2 | 2 | 6234656 | 5129446 | NCO      | 270  | 5129211 | 5129412 | 5129467 | 5129695 |
| NCO | 2 | 3 | 5311445 | 1577617 | NCO      | 134  | 1577457 | 1577642 | 1577672 | 1577695 |
| NCO | 2 | 3 | 5311445 | 2103899 | NCO      | 368  | 2103630 | 2103799 | 2103989 | 2104176 |
| NCO | 2 | 3 | 5311445 | 2432035 | NCO      | 985  | 2431447 | 2431638 | 2432263 | 2432791 |
| NCO | 2 | 4 | 4556834 | 1138997 | NCO      | 244  | 1138845 | 1138905 | 1139077 | 1139160 |
| NCO | 2 | 4 | 4556834 | 1725946 | NCO      | 1217 | 1724988 | 1725687 | 1726330 | 1726778 |
| NCO | 2 | 6 | 4000387 | 1408314 | NCO      | 2836 | 1406831 | 1406962 | 1409630 | 1409834 |
| NCO | 2 | 7 | 3823438 | 2141143 | NCO      | 435  | 2140902 | 2140949 | 2141212 | 2141509 |
| NCO | 3 | 1 | 6835803 | 1958346 | NCO      | 151  | 1958151 | 1958389 | 1958402 | 1958440 |



|     |   |   |         |         |     |      |         |         |         |         |
|-----|---|---|---------|---------|-----|------|---------|---------|---------|---------|
| NCO | 3 | 1 | 6835803 | 254869  | NCO | 7468 | 250965  | 251305  | 258564  | 258641  |
| NCO | 3 | 2 | 6234656 | 276387  | NCO | 76   | 276341  | 276357  | 276394  | 276455  |
| NCO | 3 | 2 | 6234656 | 1081326 | NCO | 130  | 1081240 | 1081282 | 1081314 | 1081467 |
| NCO | 3 | 2 | 6234656 | 1516659 | NCO | 1647 | 1515769 | 1515902 | 1517414 | 1517551 |
| NCO | 3 | 2 | 6234656 | 4581999 | NCO | 1444 | 4581140 | 4581413 | 4582518 | 4582923 |
| NCO | 3 | 3 | 5311445 | 2084400 | NCO | 785  | 2083858 | 2084158 | 2084730 | 2084855 |
| NCO | 3 | 3 | 5311445 | 2086858 | NCO | 295  | 2086583 | 2086838 | 2086932 | 2087078 |
| NCO | 3 | 3 | 5311445 | 4831375 | NCO | 1129 | 4830502 | 4831120 | 4831818 | 4832061 |
| NCO | 3 | 5 | 4159965 | 164706  | NCO | 4341 | 162435  | 162635  | 166837  | 166915  |
| NCO | 3 | 6 | 4000387 | 1263128 | NCO | 151  | 1263014 | 1263092 | 1263164 | 1263243 |
| NCO | 3 | 6 | 4000387 | 2582114 | NCO | 151  | 2581995 | 2582082 | 2582161 | 2582218 |
| NCO | 3 | 7 | 3823438 | 532598  | NCO | 47   | 532552  | 532597  | 532612  | 532631  |
| NCO | 3 | 7 | 3823438 | 714647  | NCO | 166  | 714501  | 714627  | 714682  | 714777  |
| NCO | 3 | 7 | 3823438 | 2433134 | NCO | 350  | 2432818 | 2433100 | 2433281 | 2433337 |
| NCO | 1 | 3 | 5311445 | 3118049 | NCO | 155  | 3117969 | 3117975 | 3117984 | 3118269 |
| NCO | 1 | 6 | 4000387 | 2042371 | NCO | 759  | 2041331 | 2042652 | 2042737 | 2042764 |

Table S15. APD density in the CO-associated GC tracts

| strain | number                                              |                                   |                                   | accumulate %                                        |                                   |                                   |
|--------|-----------------------------------------------------|-----------------------------------|-----------------------------------|-----------------------------------------------------|-----------------------------------|-----------------------------------|
|        | <i>T. reesei</i><br>QM6a/CBS999.97( <i>MAT1-1</i> ) | <i>S. cerevisiae</i><br>S288c/SK1 | <i>S. cerevisiae</i><br>hed1 dmc1 | <i>T. reesei</i><br>QM6a/CBS999.97( <i>MAT1-1</i> ) | <i>S. cerevisiae</i><br>S288c/SK1 | <i>S. cerevisiae</i><br>hed1 dmc1 |
| < 2.5  | 0                                                   | 215                               | 100                               | 0                                                   | 17.02296                          | 19.01141                          |
| < 5    | 4                                                   | 658                               | 283                               | 8                                                   | 52.09818                          | 53.80228                          |
| < 7.5  | 9                                                   | 1007                              | 429                               | 18                                                  | 79.7308                           | 81.55894                          |
| < 10   | 14                                                  | 1174                              | 496                               | 28                                                  | 92.95329                          | 94.29658                          |
| < 12.5 | 18                                                  | 1220                              | 511                               | 36                                                  | 96.59541                          | 97.14829                          |
| < 15   | 20                                                  | 1237                              | 517                               | 40                                                  | 97.94141                          | 98.28897                          |
| < 17.5 | 25                                                  | 1250                              | 524                               | 50                                                  | 98.9707                           | 99.61977                          |
| < 20   | 29                                                  | 1258                              | 525                               | 58                                                  | 99.60412                          | 99.80989                          |
| < 30   | 35                                                  | 1262                              | 526                               | 70                                                  | 99.92082                          | 100                               |
| < 40   | 39                                                  | 1263                              | 526                               | 78                                                  | 100                               | 100                               |
| < 50   | 41                                                  | 1263                              | 526                               | 82                                                  | 100                               | 100                               |
| ≥ 50   | 9                                                   | 0                                 | 0                                 | 100                                                 | 100                               | 100                               |
| Total  | 50                                                  | 1263                              | 526                               | 100%                                                | 100%                              | 100%                              |

Table S16. Chromosomal locations of *T. reesei* genes encoding Rad51 and its associated accessory factors

| Gene_id     | chr        | feature | start   | end     | Strand | Gene name | Li et al. (1) | <i>S. cerevisiae</i> |              | <i>N. crassa</i> |               | <i>S. pombe</i> |              |
|-------------|------------|---------|---------|---------|--------|-----------|---------------|----------------------|--------------|------------------|---------------|-----------------|--------------|
|             |            |         |         |         |        |           |               | SGD                  | name         | ID               | name          | ID              | name         |
| TRQ_006087  | ChI_QM6a   | gene    | 2418506 | 2419679 | +      | Rad51     | TrA0810W      | YER095W              | <i>RAD51</i> | NCU02741         | <i>mei-3</i>  | SPAC644.14c     | <i>rad51</i> |
| TRC2_000904 | Ch1_CBS1-2 | gene    | 2517125 | 2518882 | +      | Rad51     |               |                      |              |                  |               |                 |              |
| TRC1_000914 | Ch1_CBS1-1 | gene    | 2517118 | 2518876 | +      | Rad51     |               |                      |              |                  |               |                 |              |
| TRQ_005882  | ChI_QM6a   | gene    | 1828438 | 1829302 | -      | Rad52     | TrA0616C      | YML032C              | <i>RAD52</i> | NCU04275         | <i>mus-11</i> | SPAC30D11.10    | <i>rad52</i> |
| TRC2_000688 | Ch1_CBS1-2 | gene    | 1908385 | 1910789 | -      | Rad52     |               |                      |              |                  |               |                 |              |
| TRC1_000698 | Ch1_CBS1-1 | gene    | 1908385 | 1910789 | -      | Rad52     |               |                      |              |                  |               |                 |              |
| TRQ_002377  | ChII_QM6a  | gene    | 2114507 | 2116970 | +      | Rad54     | TrB0667W      | YGL163C              | <i>RAD54</i> | NCU02348         | <i>mus-25</i> | SPAC15A10.03c   | <i>rad54</i> |
| TRC2_003090 | Ch2_CBS1-2 | gene    | 2073273 | 2076051 | +      | Rad54     |               |                      |              |                  |               |                 |              |
| TRC1_003112 | Ch2_CBS1-1 | gene    | 2073255 | 2076033 | +      | Rad54     |               |                      |              |                  |               |                 |              |
| TRQ_000947  | ChIII_QM6a | gene    | 3130215 | 3132636 | +      | Rad55     | TrC0906W      | YDR076W              | <i>RAD55</i> | NCU08806         | -             | SPAC3C7.03c     | <i>rad55</i> |
| TRC2_005489 | Ch3_CBS1-2 | gene    | 3085609 | 3087862 | +      | Rad55     |               |                      |              |                  |               |                 |              |
| TRC1_005351 | Ch3_CBS1-1 | gene    | 3085565 | 3087818 | +      | Rad55     |               |                      |              |                  |               |                 |              |
| TRQ_000401  | ChIII_QM6a | gene    | 1291996 | 1295418 | -      | Rad57     | TrC0394C      | YDR004W              | <i>RAD57</i> | NCU01771         | -             | SPAC20H4.07     | <i>rad57</i> |
| TRC2_004932 | Ch3_CBS1-2 | gene    | 1231087 | 1233385 | -      | Rad57     |               |                      |              |                  |               |                 |              |
| TRC1_004783 | Ch3_CBS1-1 | gene    | 1231052 | 1233350 | -      | Rad57     |               |                      |              |                  |               |                 |              |

Table S17. The dissociation rates (mean±SEM) determined from Figure 5.

|            | <i>ScDmc1</i> (1/min) | <i>ScRad51</i> (1/min) | <i>TrRad51</i> (1/min) |
|------------|-----------------------|------------------------|------------------------|
| 15 nt Homo | 0.021±0.001           | 0.019±0.002            | 0.025±0.001            |
| 15 nt Mis  | 0.027±0.001           | 0.031±0.001            | 0.029±0.001            |
| 12 nt Homo | 0.050±0.003           | 0.029±0.002            | 0.056±0.004            |

Table S18. List of *S. cerevisiae* strains used in this study.

| Name     | Genetic background | Genotype                                                                                                                                                      | Reference |
|----------|--------------------|---------------------------------------------------------------------------------------------------------------------------------------------------------------|-----------|
| ORT7235  | S288c              | <i>MATa arg4-Bgl his3Δ200 leu2Δ0 lys2Δ0 met15Δ0 trp1Δ63 ura3Δ0</i>                                                                                            | (24)      |
| ORT7237  | SK1                | <i>MATa arg4-RV his4B::LEU2 leu2::hisG lys2 trp1::hisG ura3Δ(PstI-SmaI)::hisG</i>                                                                             | (24)      |
| AND1702  | S288c/SK1          | <i>MATa/MATa arg4-Bgl/arg4-RV his3Δ200/HIS3 HIS4/his4B::LEU2 leu2Δ0/leu2::hisG lys2Δ0/lys2 met15Δ0/MET15 trp1Δ63/trp1::hisG ura3Δ0/ura3Δ(PstI-SmaI)::hisG</i> | (24)      |
| NH2294   | S288c/SK1          | as AND1702, but <i>dmc1Δ::kanMX6/'' hed1Δ::hphMX4/''</i>                                                                                                      | (5)       |
| NHY4723  | SK1                | <i>MATa ho::hisG ura3Δ(PstI-SmaI)::hisG leu2::hisG ERG1-(SpeI) his4-X::LEU2-(NgoMIV; +ori)-URA3</i>                                                           | (25)      |
| WHY13283 | SK1                | as NHY4723, but <i>rad51Δ::hphMX4</i>                                                                                                                         | (26)      |
| WHY13723 | S288c/SK1          | as AND1702, but <i>RAD51::natMX4/''</i>                                                                                                                       | This work |
| WHY13731 | S288c/SK1          | as NH2294, but <i>RAD51::natMX4/''</i>                                                                                                                        | This work |
| WHY13725 | S288c/SK1          | as AND1702, but <i>rad51-trL1::natMX4/''</i>                                                                                                                  | This work |
| WHY13733 | S288c/SK1          | as NH2294, but <i>rad51-trL1::natMX4/''</i>                                                                                                                   | This work |
| WHY13727 | S288c/SK1          | as AND1702, but <i>rad51-trL2::natMX4/''</i>                                                                                                                  | This work |
| WHY13735 | S288c/SK1          | as NH2294, but <i>rad51-trL2::natMX4/''</i>                                                                                                                   | This work |
| WHY13729 | S288c/SK1          | as AND1702, but <i>rad51-trL1L2::natMX4/''</i>                                                                                                                | This work |
| WHY13737 | S288c/SK1          | as NH2294, but <i>rad51-trL1L2::natMX4/''</i>                                                                                                                 | This work |
| WHY13843 | S288c/SK1          | as AND1702, but <i>rad51-S291T::natMX4/''</i>                                                                                                                 | This work |
| WHY13844 | S288c/SK1          | as NH2294, but <i>rad51-S291T::natMX4/''</i>                                                                                                                  | This work |
| WHY13853 | S288c/SK1          | as AND1702, but <i>rad51-S291T-trL2::natMX4/''</i>                                                                                                            | This work |
| WHY13855 | S288c/SK1          | as NH2294, but <i>rad51-S291T-trL2::natMX4/''</i>                                                                                                             | This work |
| WHY13865 | S288c/SK1          | as AND1702, but <i>rad51-A298N::natMX4/''</i>                                                                                                                 | This work |
| WHY13867 | S288c/SK1          | as NH2294, but <i>rad51-A298N::natMX4/''</i>                                                                                                                  | This work |
| WHY13877 | S288c/SK1          | as AND1702, but <i>rad51-A298N-trL2::natMX4/''</i>                                                                                                            | This work |
| WHY13879 | S288c/SK1          | as NH2294, but <i>rad51-A298N-trL2::natMX4/''</i>                                                                                                             | This work |
| WHY13819 | S288c/SK1          | as AND1702, but <i>rad51-M301T::natMX4/''</i>                                                                                                                 | This work |
| WHY13821 | S288c/SK1          | as NH2294, but <i>rad51-M301T::natMX4/''</i>                                                                                                                  | This work |
| WHY13831 | S288c/SK1          | as AND1702, but <i>rad51-M301T-trL2::natMX4/''</i>                                                                                                            | This work |

|          |           |                                                    |           |
|----------|-----------|----------------------------------------------------|-----------|
| WHY13833 | S288c/SK1 | as NH2294, but <i>rad51-M301T-trL2::natMX4</i> /'  | This work |
| WHY13794 | S288c/SK1 | as AND1702, but <i>rad51-M301Q::natMX4</i> /'      | This work |
| WHY13797 | S288c/SK1 | as NH2294, but <i>rad51-M301Q::natMX4</i> /'       | This work |
| WHY13807 | S288c/SK1 | as AND1702, but <i>rad51-M301Q-trL2::natMX4</i> /' | This work |
| WHY13809 | S288c/SK1 | as NH2294, but <i>rad51-M301Q-trL2::natMX4</i> /'  | This work |

The indicated *rad51* mutant alleles with *ADHI* transcription terminator were integrated into each haploid parental strain (SK1 or S288c) to replace the native *RAD51* coding sequence, and the haploid transformants were selected by resistance to nourseothricin conferred by the *natMX4* cassette inserted between the *ADHI* transcription terminator and the native transcription terminator of *RAD51*. The amino acid substitutions encoded in the *rad51* locus were then confirmed using DNA sequencing. The haploid SK1 and S288c mutants with the indicated *rad51* mutation were then mated to make hybrid diploids that are homozygous for the *rad51* mutant allele.

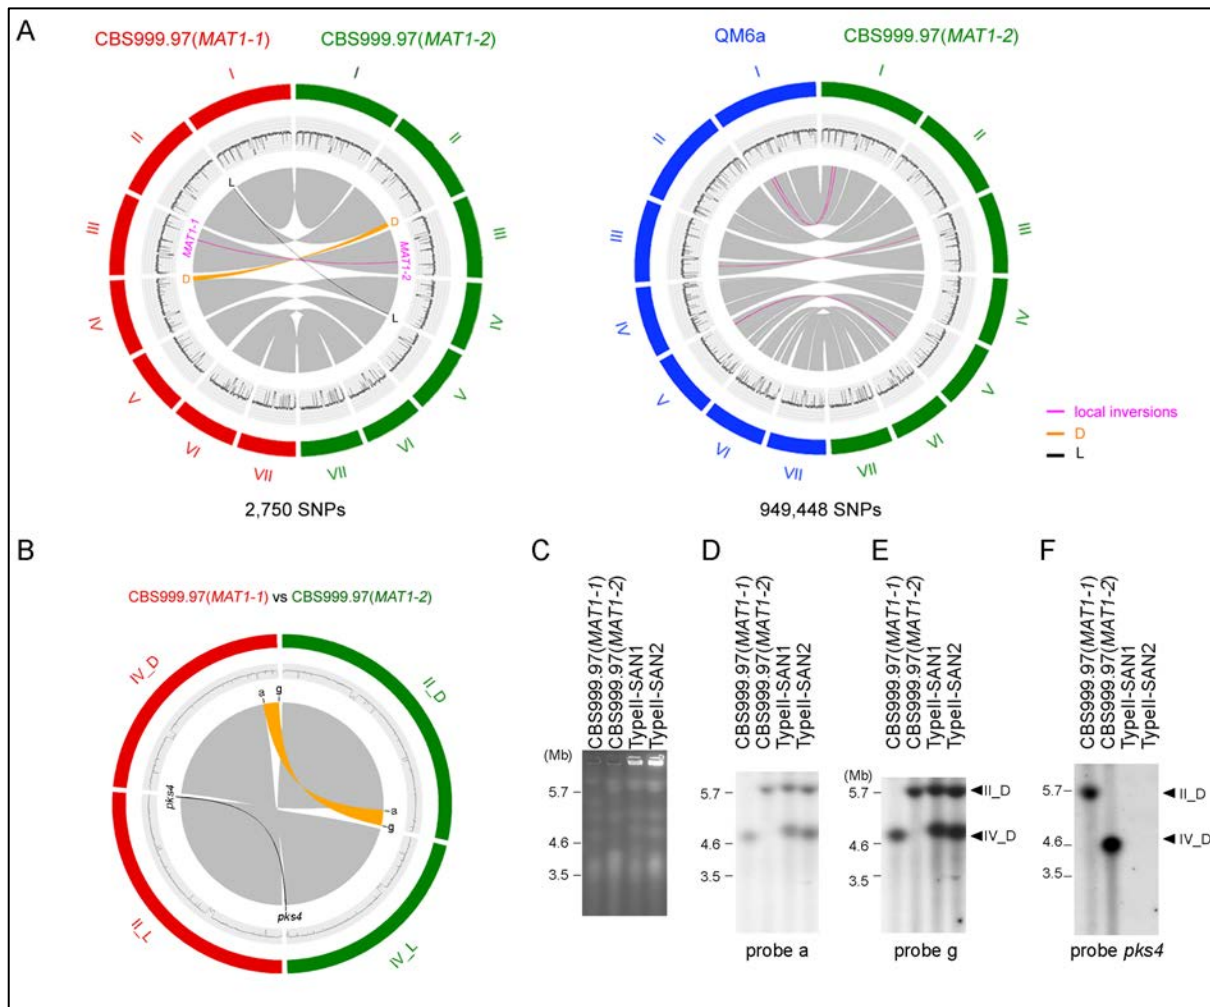

**Figure S1. PacBio genome sequencing and assembly.** (A) Conserved synteny, inversions and translocations between CBS999.97(*MAT1-1*) and CBS999.97(*MAT1-2*) (left-panel) and between QM6a and CBS999.97(*MAT1-2*) (right panel). Collinearity of *T. reesei* genomes is depicted in grey in the inner circles of the diagrams. The D segment is indicated in orange, the L segment in black, and local inversions in magenta. The outer circles indicate the seven chromosomes (I-VII) of CBS999.97(*MAT1-1*) (in red), CBS999.97(*MAT1-2*) (in green) and QM6a (in blue). The GC contents (window size 5000 bp) of the seven chromosomes are shown in the middle traces. (B) Reciprocal translocation in CBS999.97(*MAT1-1*). Sexual crosses of CBS999.97(*MAT1-1*) with QM6a or CBS999.97(*MAT1-2*) resulted in ~10% asci with 16 euploid ascospores and ~90% asci with two different types of segmentally aneuploid (SAN) ascospores(1). Using the array-based comparative genome hybridization (aCGH) method, we showed previously that the euploid progeny, as for QM6a and the two CBS999.97 parental strains, germinate to form mycelia with dark-green conidia (i.e., asexual spores). Due to loss of the D segment (~0.5 Mb), type I SAN ascospores cannot germinate. Type II SAN ascospores possess two D segments but lack the L segment (~30 kb). Unlike type I SAN ascospores, type II SAN ascospores can germinate and form mycelia with white conidia(1). The high-quality genome sequences of the three *T. reesei* strains readily confirm the translocation event between the D segment and the L segment. The D segment is indicated in orange, the L segment in black, and local inversions in magenta. The outer circles indicate the two rearranged chromosomes in CBS999.97(*MAT1-1*) (in red) and CBS999.97(*MAT1-2*) (in green). The D segment is located at the right terminus of chromosome II (ChII) in QM6a and CBS999.97(*MAT1-2*) or at the right terminus of chromosome IV (ChIV) in CBS999.97(*MAT1-*

1). In contrast, the L segment is located at the right terminus of ChIV in QM6a and CBS999.97(*MATI-2*) or at the right terminus of ChII in CBS999.97(*MATI-1*). CBS999.97(*MATI-1*) and CBS999.97(*MATI-2*) were referred to in a previous study(1) as CBS999.97(*MATI-1*, ChII\_L, ChIV\_D) and CBS999.97(*MATI-2*, ChII\_D, ChIV\_L), respectively. (C) Pulsed field gel electrophoresis (PFGE) was applied to separate the seven chromosomes of CBS999.97(*MATI-1*), CBS999.97(*MATI-2*) and two type II SAN progeny strains (SAN1 and SAN2). (c-e) Southern hybridization with the DNA probes a (D) and g (E) in the D segment, as well as a DNA probe in the L segment (i.e., *pks4*) (F). The results confirmed that CBS999.97(*MATI-1*) and CBS999.97(*MATI-2*) contain the D and L segments in the two corresponding chromosomes. In contrast, in SAN1 and SAN2, both ChII and ChIV harbored the D segment but not the L segment (C-E). These results provide additional evidence of high-quality genome assembly for these two CBS999.97 haploid strains.



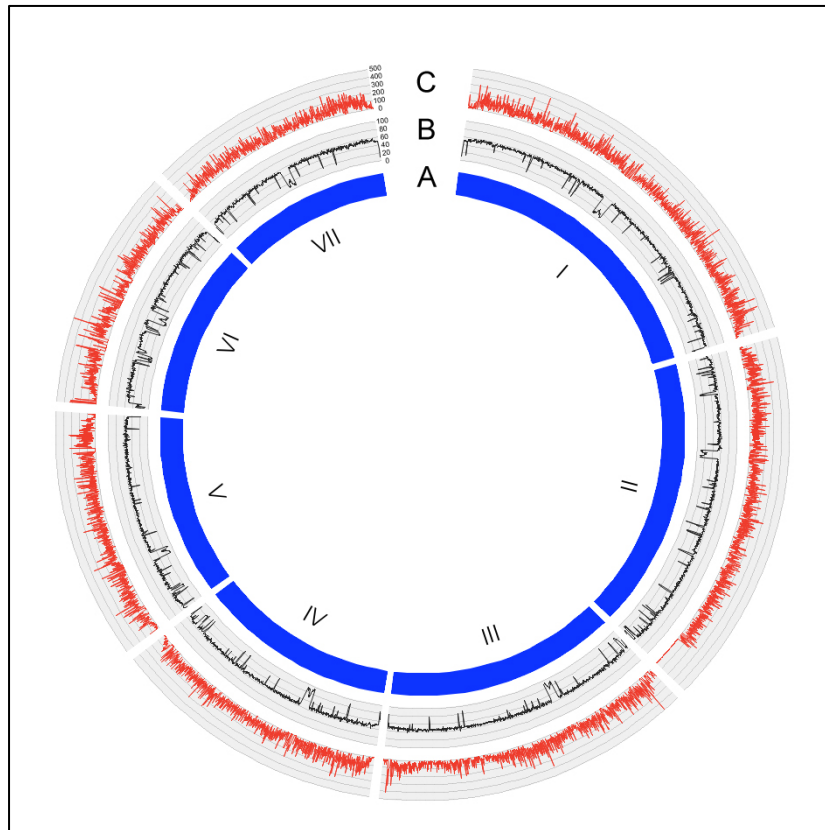

**Figure S2. APD markers are evenly distributed throughout the seven chromosomes of QM6a and CBS999.97(*MATI-1*).** CIRCOS was used to visualize the genome-wide APDs revealed by MUMmer4. (A) The karyotype of the QM6a genome (in blue). (B) Guanosine and cytosine (GC) content based on a sliding window of 5000 bp. (C) Variation distribution by chromosome. The APD density between QM6a and CBS999.97(*MATI-1*) was calculated in a 3-kb window.



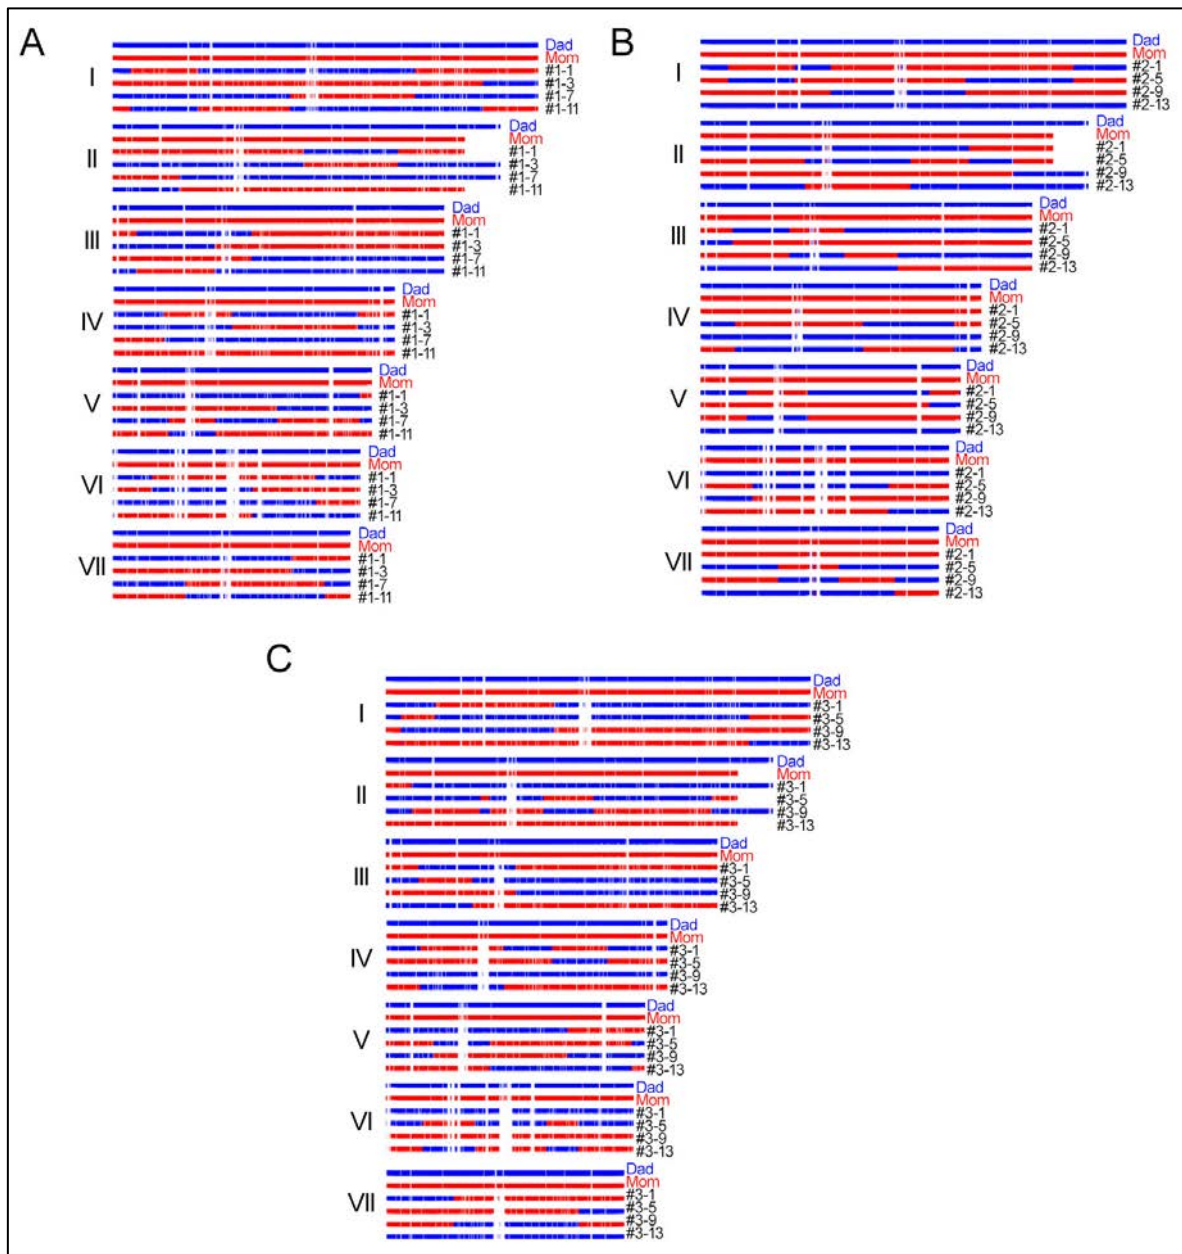

**Figure S4. Application of the NGS-based variant calling approach to detect *Trichoderma reesei* meiotic recombination products.** MUMmer4 was used to genotype APD positions between four representative F1 progeny relative to QM6a and CBS999.97(*MATI-1*). The results were analyzed in Recombine (v2.1) and GroupEvents (8) to detect CO and NCO products (with  $\geq 2$  3:1 and/or 4:0 markers). PlotTetrad (8), a component of Recombine (v2.1), was then used to create graphical representations of all seven chromosomes of the two parental strains and the four representative F1 progeny. QM6a and sequence-identical recombination products are depicted with blue bars and those of CBS999.97(*MATI-1*) are represented by red bars. Empty areas are highly AT-rich sequences lacking read coverage or APDs. The Illumina NextSeq paired ends from the four representative F1 progeny were used to generate the genome-wide recombination profiles of the three QM6a/CBS999.97(*MATI-1*) asci (represented in A-C).

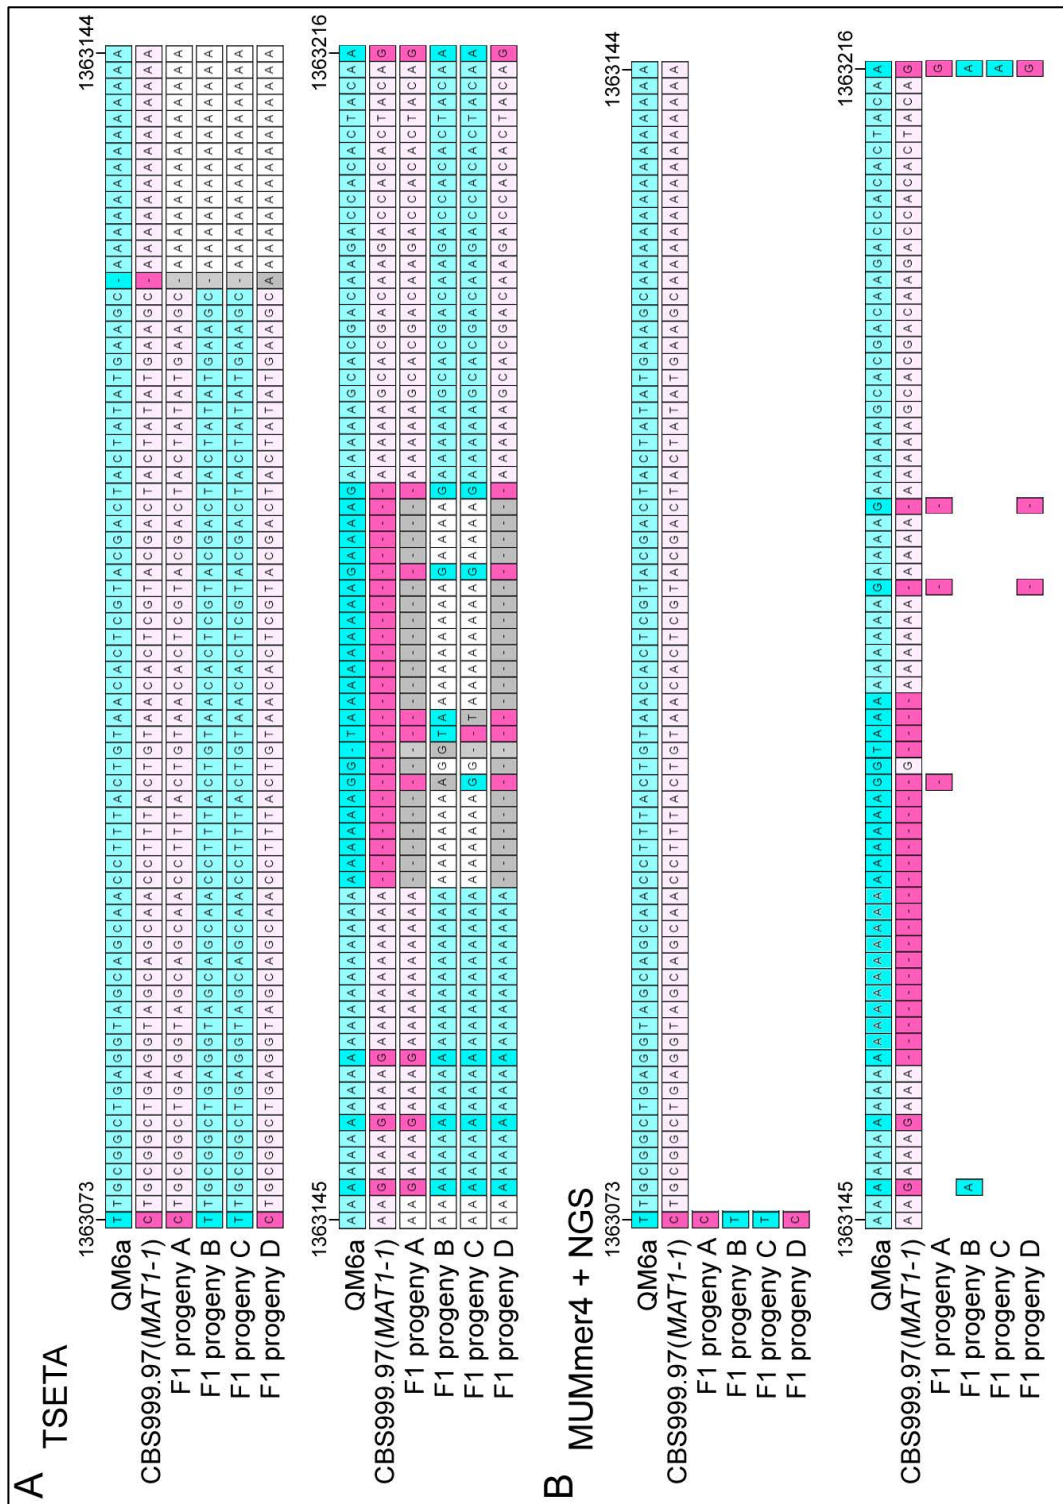

**Figure S5. The NCO (with  $\geq 2$  APDs and  $\geq 1$  SNP) revealed by the "Tetrad" mode of TSETA (A) but not the NGS-based method (B).** Intuitive visualization of the two NCO meiotic recombination products at single-nucleotide level. All non-2:2 markers are highlighted in cyan. The NCO product (Ch4: 1363073-1363216) comprise three SNP 1:3 or 3:1 markers and is located within a polyA/T fragment in QM6a. As described in Figure 1A, MUMmer4 (but not TSETA) introduced three short sequence gaps after variant calling. Subsequently, the NGS-based method failed to identify SNPs and/or InDels in the corresponding chromosomal regions of the four representative F1 progeny (B).

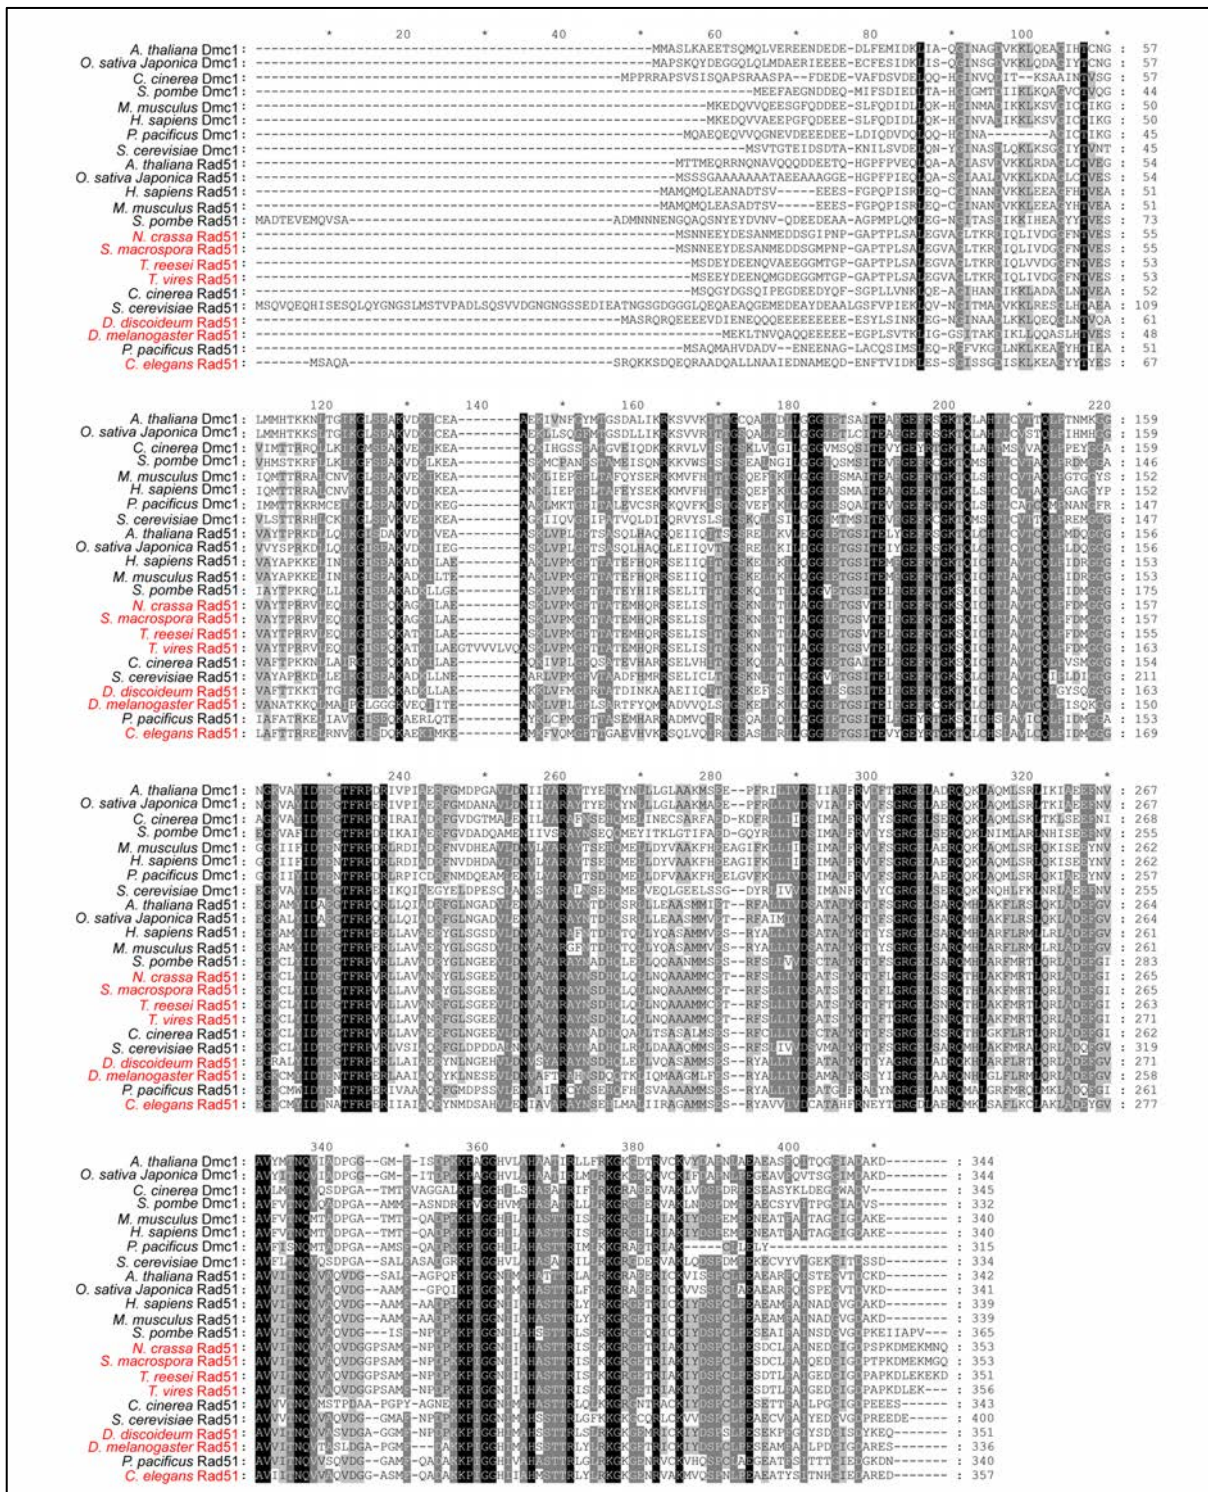

**Figure S6. Alignment of the amino acid sequences of Rad51 and Dmc1 from 15 different species. Alignment of the amino acid sequences of Rad51 and Dmc1 from 15 different species. Dmc1 was lost in seven Rad51-only eukaryotic organisms (in red). The 15 Rad51 and 8 Dmc1 protein sequences were aligned using ClustalW with default settings in MEGA version 7 (27).**

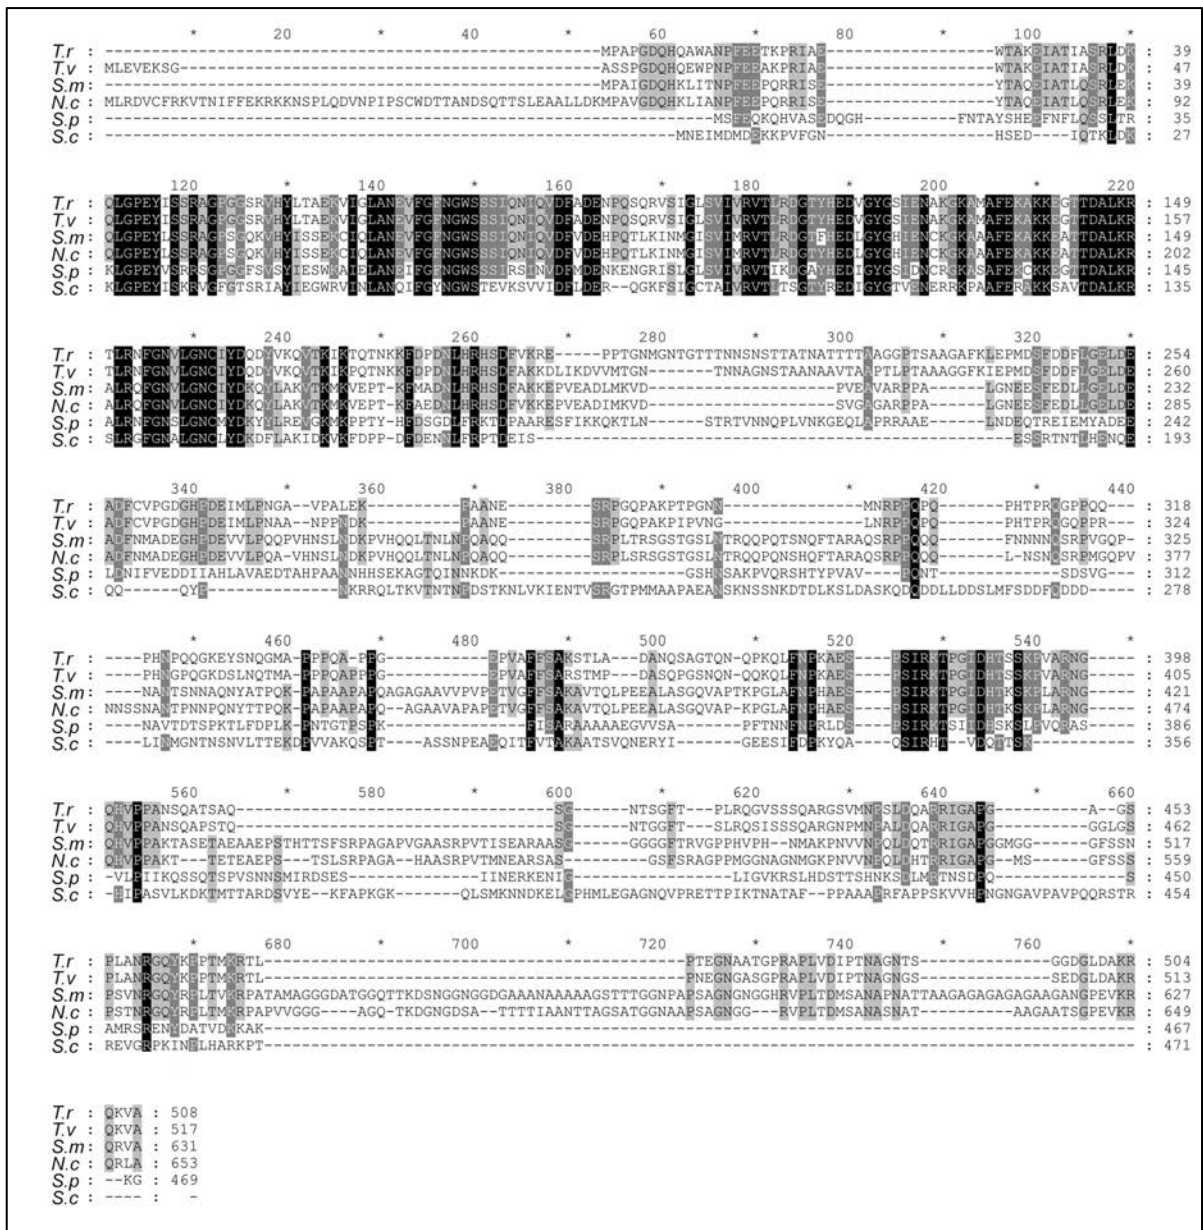

**Figure S7. Rad52 homolog sequence alignment.** Amino acid sequence alignment of *Trichoderma reesei* (*T.r.*) Rad52 protein with those of *Trichoderma virens* (*T.v.*), *Sordaria macrospora* (*S.m.*), *Neurospora crassa* (*N.c.*), *Schizosaccharomyces pombe* (*S.p.*), and *Saccharomyces cerevisiae* (*S.c.*).

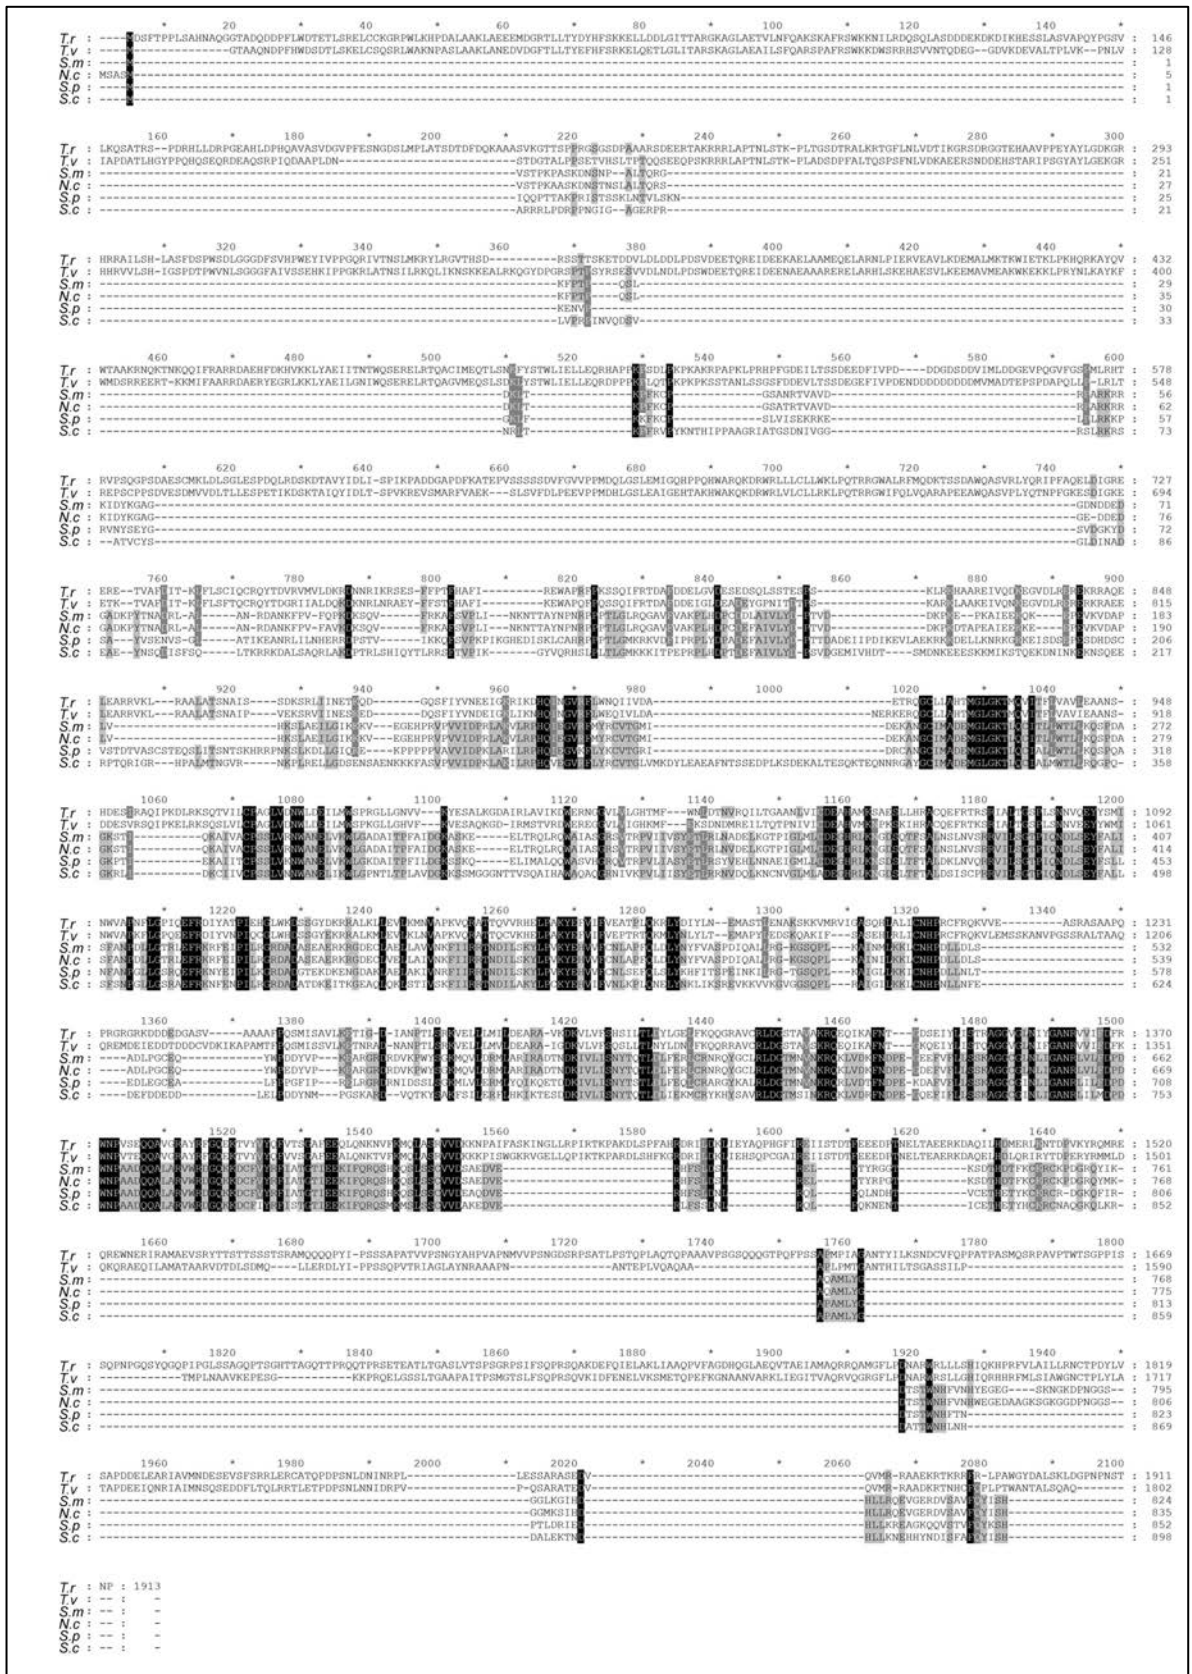

**Figure S8. Rad54 homolog sequence alignment.** Amino acid sequence alignment of *Trichoderma reesei* (*T.r.*) Rad54 protein with those of *Trichoderma virens* (*T.v.*), *Sordaria macrospora* (*S.m.*), *Neurospora crassa* (*N.c.*), *Schizosaccharomyces pombe* (*S.p.*), and *Saccharomyces cerevisiae* (*S.c.*).

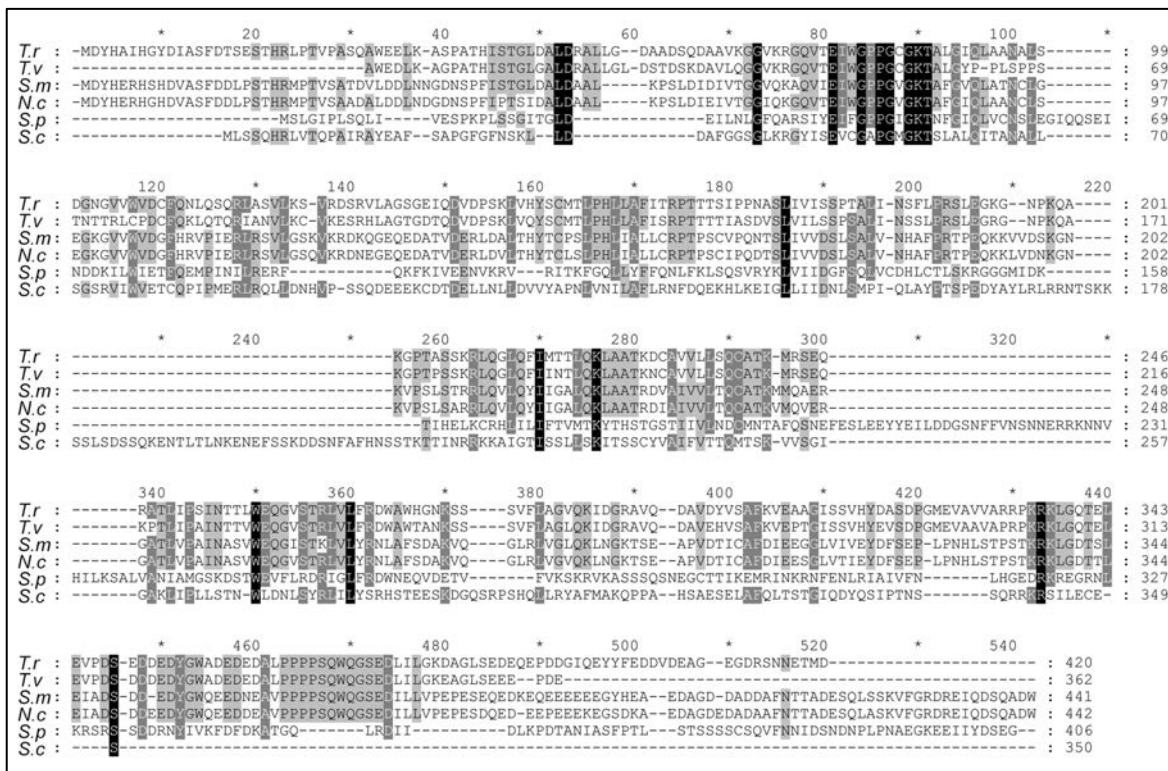

**Figure S9. Rad55 homolog sequence alignment.** Amino acid sequence alignment of *Trichoderma reesei* (*T.r.*) Rad55 protein with those of *Trichoderma virens* (*T.v.*), *Sordaria macrospora* (*S.m.*), *Neurospora crassa* (*N.c.*), *Schizosaccharomyces pombe* (*S.p.*), and *Saccharomyces cerevisiae* (*S.c.*).



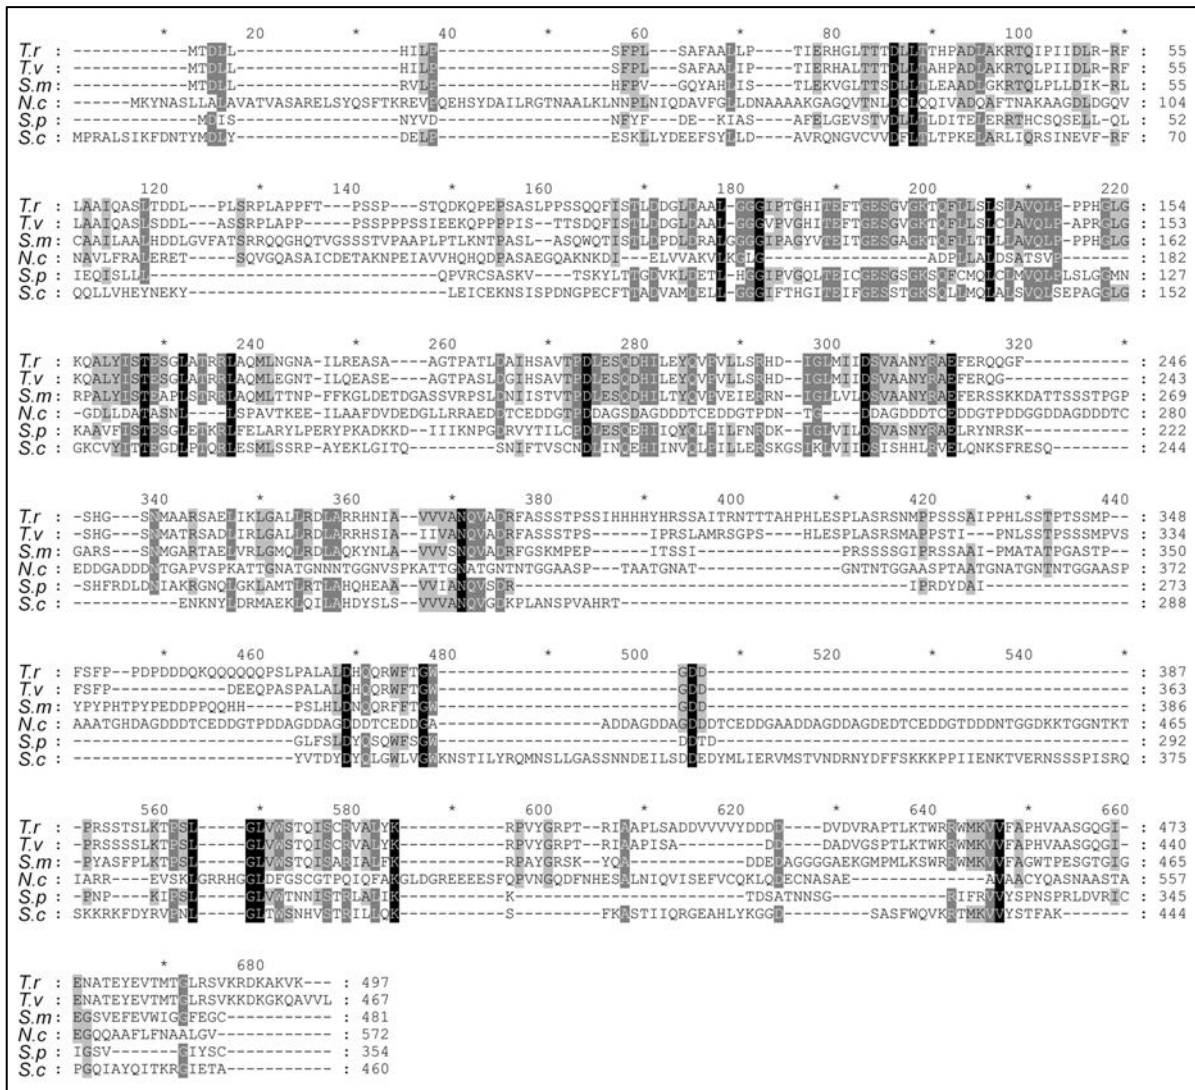

**Figure S10. Rad57 homolog sequence alignment.** Amino acid sequence alignment of *Trichoderma reesei* (*T.r.*) Rad57 protein with those of *Trichoderma virens* (*T.v.*), *Sordaria macrospora* (*S.m.*), *Neurospora crassa* (*N.c.*), *Schizosaccharomyces pombe* (*S.p.*), and *Saccharomyces cerevisiae* (*S.c.*).

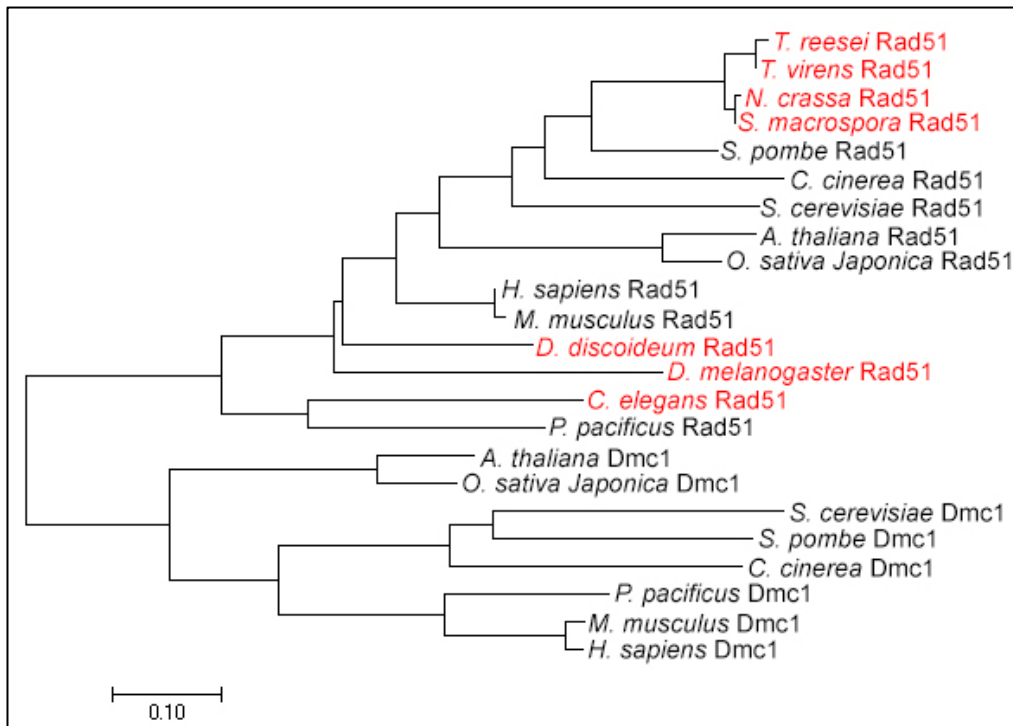

**Figure S11. Phylogenetic tree of Rad51 and Dmc1 proteins from 15 different eukaryotic organisms.** Dmc1 was lost from the six “Rad51-only” eukaryotic organisms (in red). Evolutionary history was inferred by using a Maximum Likelihood approach and the JTT matrix-based model in MEGA7 (27). The tree is drawn to scale, with branch lengths representing the number of substitutions per site. The analysis involved 23 amino acid sequences. All positions containing gaps and missing data were eliminated. The final dataset represents a total of 290 positions.

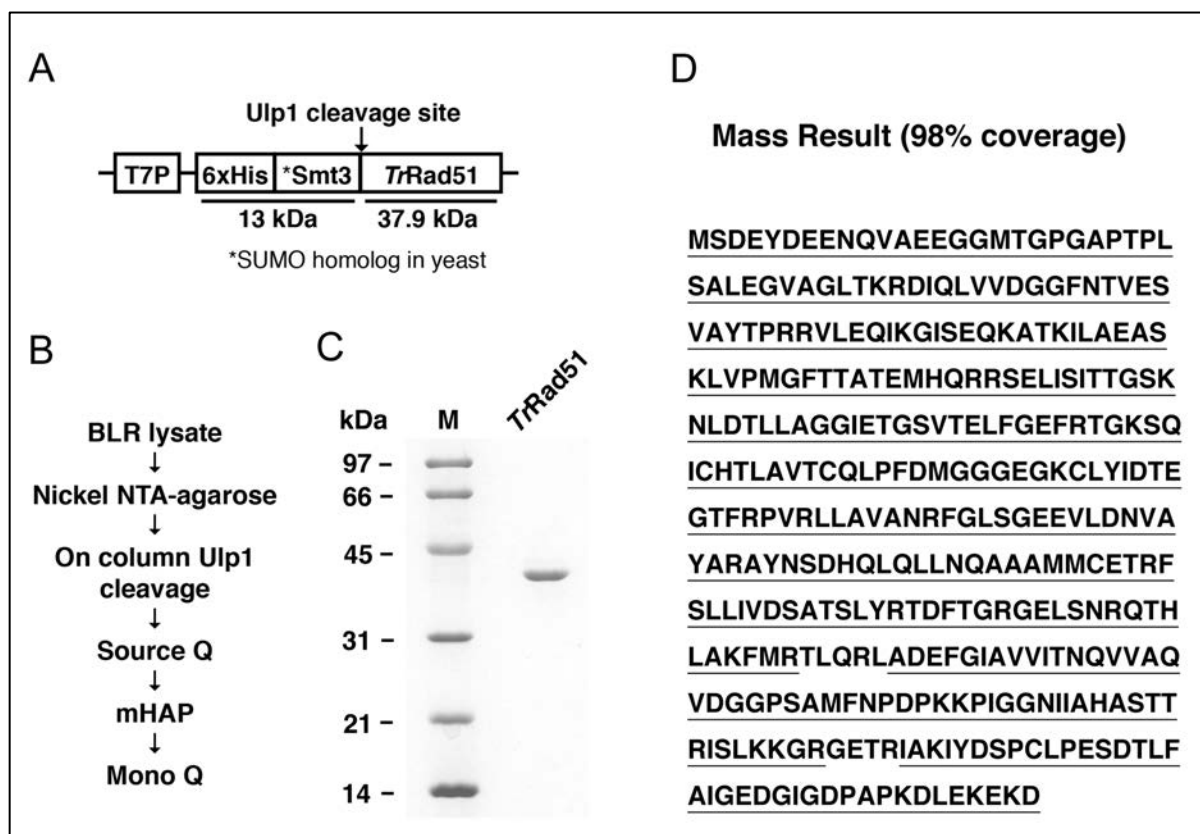

**Figure S12. Expression and purification of *TrRad51*.** (A) Schematic of the (His)<sub>6</sub>-Smt3-*TrRad51* expression plasmid(4). *TrRad51* was expressed in the *recA*-deficient BLR *E. coli* strain. (B) Schematic of the comprehensive chromatographic procedure we performed for *TrRad51* purification. Details of purification conditions are described in “Materials and Methods”. (C) Purified *TrRad51* protein (1.2 μg) was analyzed by 12% SDS-PAGE. (D) The identity of purified protein was further confirmed by MALDI-TOF analysis. The underlined amino acids correspond with the identified fragments of purified *TrRad51*.

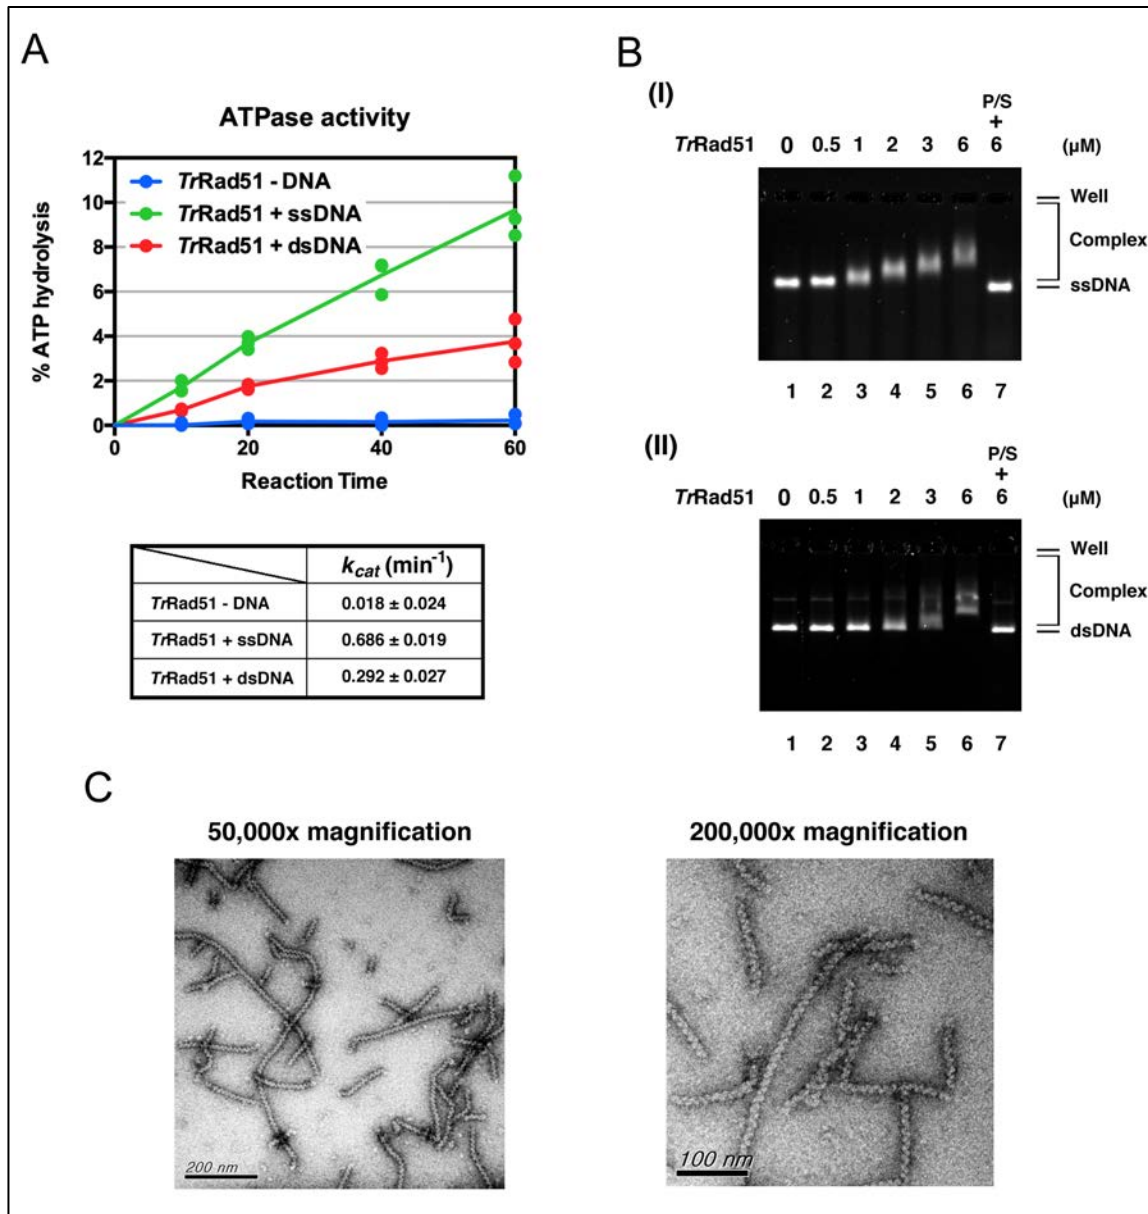

**Figure S13. The biochemical and biophysical characteristics of *TrRad51*.** *TrRad51* possesses the general properties of recombinases, including DNA-stimulated ATPase activity, DNA binding, and the formation of nucleoprotein filament. (A) *TrRad51* (2.5  $\mu\text{M}$ ) was incubated with  $\gamma\text{-P}^{32}\text{-ATP}$  and  $\Phi\text{x174}$  viral (+ sense) ssDNA (15  $\mu\text{M}$ ) or linearized dsDNA (15  $\mu\text{M}$ ), and then subjected to thin-layer chromatography at the indicated times to monitor ATPase activity. The quantitative data shown are average values  $\pm$  s.e.m. from three independent experiments. (B) For the DNA mobility shift assay, the indicated concentrations of *TrRad51* was mixed with (I) ssDNA or (II) dsDNA for 30 min to monitor DNA binding. The samples with the highest protein concentration were treated with proteinase K and SDS (P/S) to release DNA. (C) *TrRad51* (0.8  $\mu\text{M}$ ) was incubated with 80-mer ssDNA (2.4  $\mu\text{M}$ ) for 30 min and nucleoprotein filaments were visualized by electron microscopy.

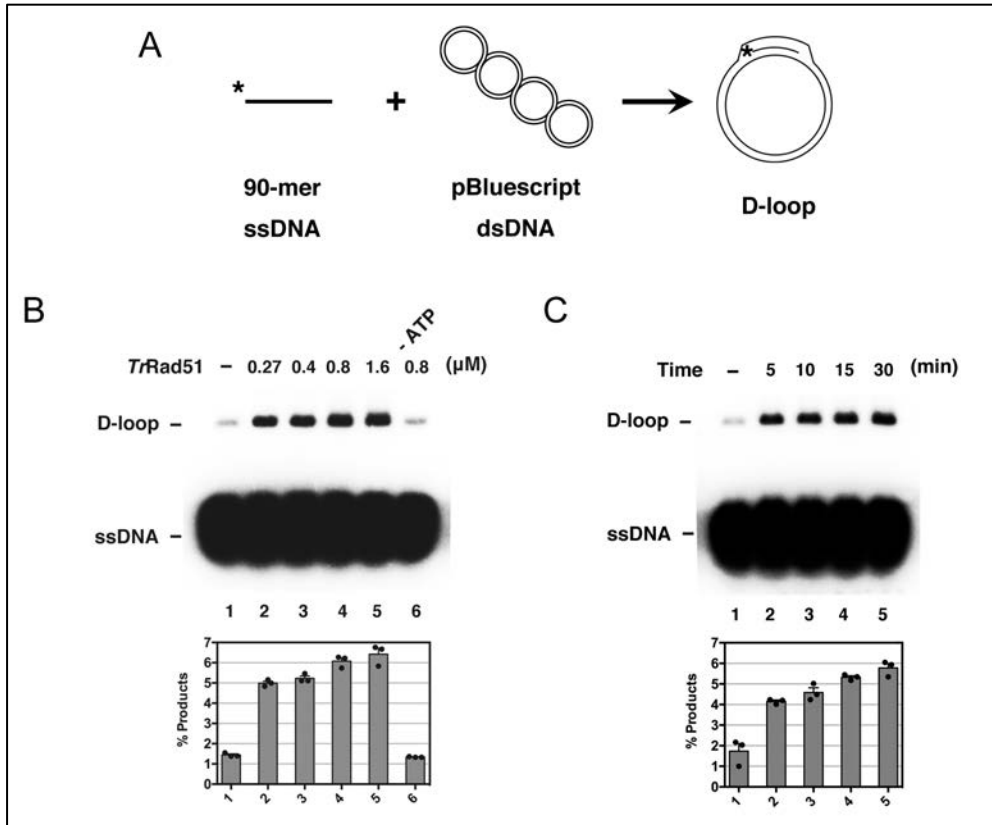

**Figure S14. Monitoring *TrRad51* recombinase activity by displacement-loop assay.** (A) Schematic of the displacement-loop assay. The  $^{32}\text{P}$ -labeled 90-mer ssDNA was pre-incubated with *TrRad51* and addition of dsDNA initiated the reaction. The radiolabeled end products were visualized and quantified by phosphorimaging analysis. (B) Formation of D-loop product at the indicated *TrRad51* protein concentrations was monitored. (C) Formation of D-loop product at the indicated reaction times was monitored. The quantitative data shown are average values  $\pm$  s.e.m. from three independent experiments.

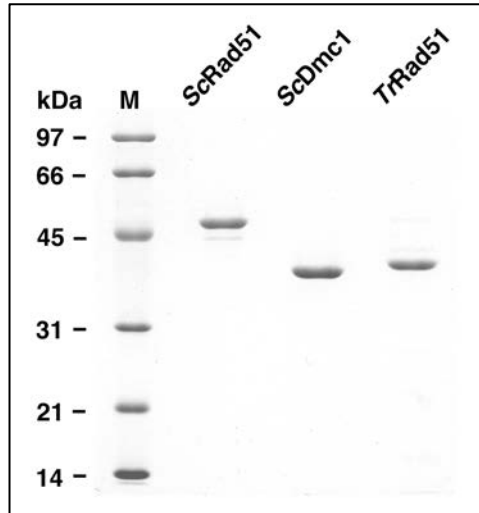

**Figure S15. Purified *ScRad51* and *ScDmc1*.** The purified proteins of *S. cerevisiae* Rad51 and Dmc1 (1.2  $\mu\text{g}$  each) were analyzed by 12% SDS-PAGE to confirm near 95% purity.

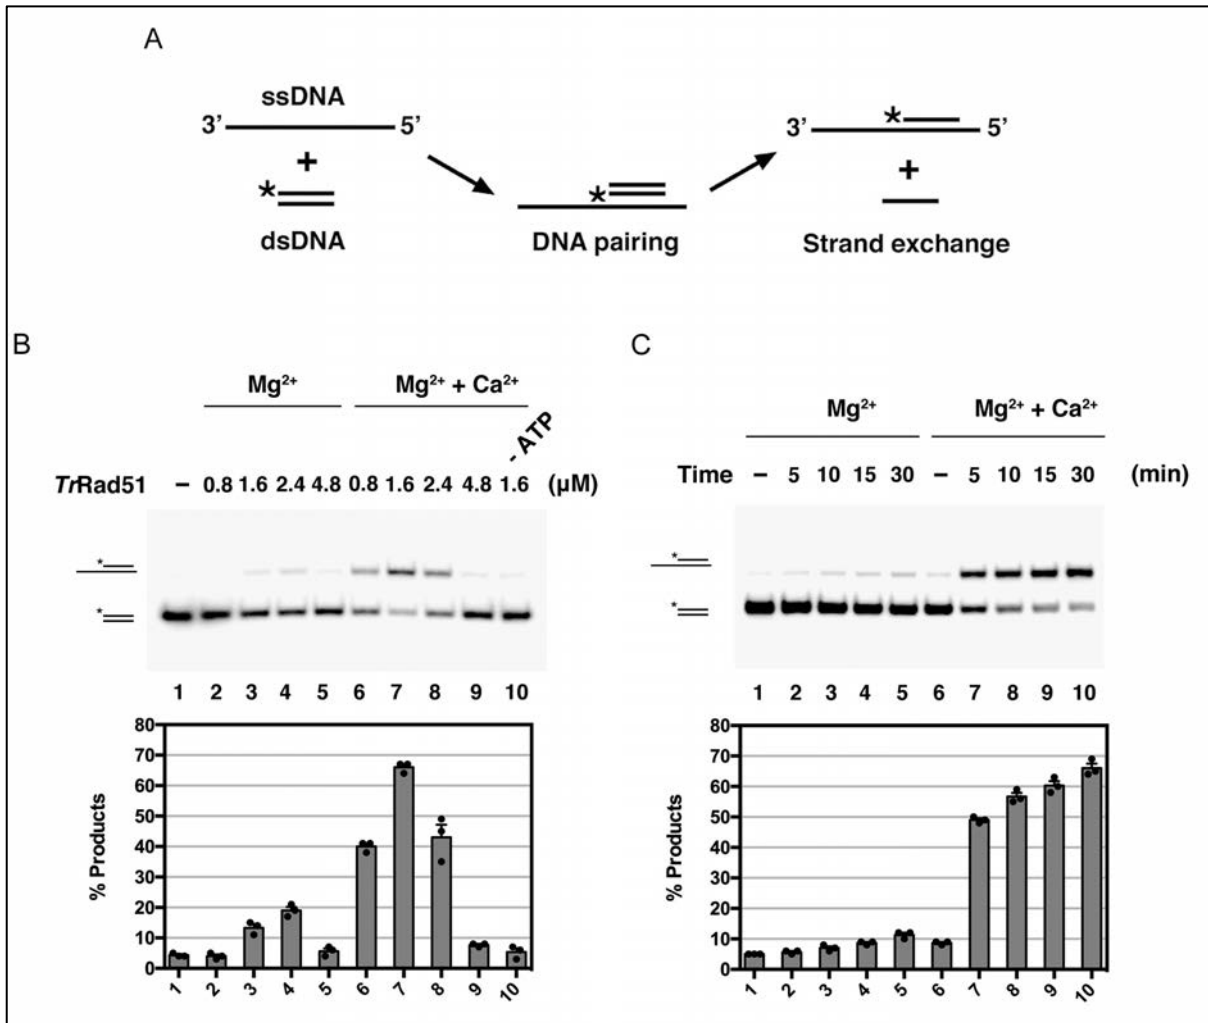

**Figure S16. *Tr*Rad51-mediated DNA strand exchange activity.** Strand exchange assay demonstrating that *Tr*Rad51 can perform strand exchange and its activity is stimulated in dosage- and time-dependent manners by the addition of calcium. (A) Schematic of the strand exchange assay. The 80-mer ssDNA was pre-incubated with *Tr*Rad51 and addition of  $^{32}P$ -labeled (asterisk) 40-mer dsDNA initiated the reaction. (B), (C) The radiolabeled end products were visualized and quantified by phosphorimaging analysis. The end product of *Tr*Rad51-mediated strand exchange was monitored with or without calcium. Protein concentration (B) or reaction time (C) is indicated. Quantitative data shown are average values  $\pm$  s.e.m. from three independent experiments.

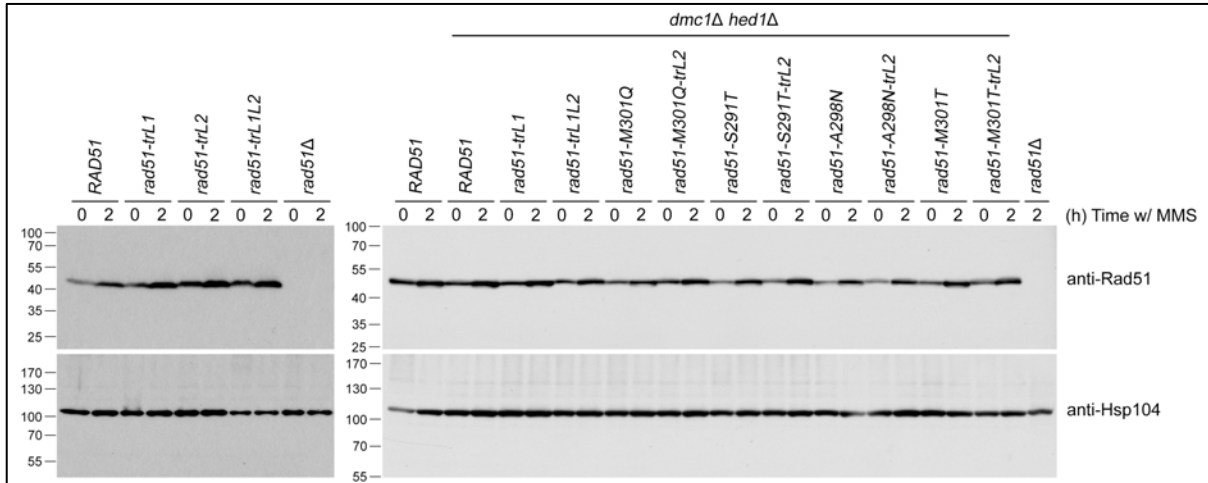

**Figure S17. Immunoblotting of WT and mutant *ScRad51* proteins in vegetatively growing cells (SI Appendix, Table S18).** Yeast strains expressing WT and mutant *ScRad51* proteins were grown in YPD media with or without 0.02% MMS for 2 hours. Total cell lysate of indicated yeast haploid strains was prepared by using the TCA precipitation protocol we developed previously(28). Total proteins were separated by SDS-PAGE. Anti-*ScRad51* antisera were used to visualize *ScRad51* proteins by Western blotting. Hsp104 was used as a loading control.



## References:

1. C. L. Chen *et al.*, Blue light acts as a double-edged sword in regulating sexual development of *Hypocrea jecorina* (*Trichoderma reesei*). *PLoS One* **7**, e44969 (2012).
2. Y. C. Chuang *et al.*, *Trichoderma reesei* meiosis generates segmentally aneuploid progeny with higher xylanase-producing capability. *Biotechnol Biofuels* **8**, 30 (2015).
3. W. C. Li *et al.*, *Trichoderma reesei* complete genome sequence, repeat-induced point mutation, and partitioning of CAZyme gene clusters. *Biotechnol Biofuels* **10**, 170 (2017).
4. C. Y. Chen, C. W. Lin, C. Y. Chang, S. T. Jiang, Y. P. Hsueh, Sarm1, a negative regulator of innate immunity, interacts with syndecan-2 and regulates neuronal morphology. *J Cell Biol* **193**, 769-784 (2011).
5. T. L. Callender *et al.*, Mek1 down regulates Rad51 activity during yeast meiosis by phosphorylation of Hed1. *Plos Genet* **12**, e1006226 (2016).
6. A. Herrera-Estrella, G. H. Goldman, M. van Montagu, R. A. Geremia, Electrophoretic karyotype and gene assignment to resolved chromosomes of *Trichoderma spp.* *Mol Microbiol* **7**, 515-521 (1993).
7. G. Marcais *et al.*, MUMmer4: A fast and versatile genome alignment system. *PLoS Comput Biol* **14**, e1005944 (2018).
8. C. M. Anderson *et al.*, ReCombine: a suite of programs for detection and analysis of meiotic recombination in whole-genome datasets. *PLoS One* **6**, e25509 (2011).
9. A. Oke, C. M. Anderson, P. Yam, J. C. Fung, Controlling meiotic recombinational repair - specifying the roles of ZMMs, Sgs1 and Mus81/Mms4 in crossover formation. *Plos Genet* **10**, e1004690 (2014).
10. W. C. Li, H. C. Liu, Y. J. Lin, S. Y. Tung, T. F. Wang, Third-generation sequencing-based mapping and visualization of single nucleotide polymorphism, meiotic

- recombination, illegitimate mutation and repeat-induced point mutation *NAR Genomics and Bioinformatics* **2**, lqaa056 (2020).
11. H. C. Liu, W. C. Li, T. F. Wang, TSETA: A Third-generation sequencing-based computational tool for mapping and visualization of SNPs, meiotic recombination products, and RIP mutations. *Methods Mol Biol* **2234**, 331-361 (2021).
  12. H. Li *et al.*, The sequence alignment/map format and SAMtools. *Bioinformatics* **25**, 2078-2079 (2009).
  13. B. J. Walker *et al.*, Pilon: an integrated tool for comprehensive microbial variant detection and genome assembly improvement. *PLoS One* **9**, e112963 (2014).
  14. C. D. Lee *et al.*, An improved SUMO fusion protein system for effective production of native proteins. *Protein Sci* **17**, 1241-1248 (2008).
  15. M. Raschle, S. Van Komen, P. Chi, T. Ellenberger, P. Sung, Multiple interactions with the Rad51 recombinase govern the homologous recombination function of Rad54. *J Biol Chem* **279**, 51973-51980 (2004).
  16. E. L. Hong, A. Shinohara, D. K. Bishop, *Saccharomyces cerevisiae* Dmc1 protein promotes renaturation of single-strand DNA (ssDNA) and assimilation of ssDNA into homologous super-coiled duplex DNA. *J Biol Chem* **276**, 41906-41912 (2001).
  17. V. Busygina *et al.*, Functional attributes of the *Saccharomyces cerevisiae* meiotic recombinase Dmc1. *DNA Repair (Amst)* **12**, 707-712 (2013).
  18. C. H. Lu *et al.*, Swi5-Sfr1 stimulates Rad51 recombinase filament assembly by modulating Rad51 dissociation. *Proc Natl Acad Sci USA* **115**, E10059-E10068 (2018).
  19. L. J. Friedman, J. Gelles, Multi-wavelength single-molecule fluorescence analysis of transcription mechanisms. *Methods* **86**, 27-36 (2015).
  20. B. Ewing, L. Hillier, M. C. Wendl, P. Green, Base-calling of automated sequencer traces using phred. I. Accuracy assessment. *Genome Res* **8**, 175-185 (1998).

21. F. A. Simao, R. M. Waterhouse, P. Ioannidis, E. V. Kriventseva, E. M. Zdobnov, BUSCO: assessing genome assembly and annotation completeness with single-copy orthologs. *Bioinformatics* **31**, 3210-3212 (2015).
22. E. V. Kriventseva *et al.*, OrthoDB v10: sampling the diversity of animal, plant, fungal, protist, bacterial and viral genomes for evolutionary and functional annotations of orthologs. *Nucleic Acids Res* **47**, D807-D811 (2019).
23. J. Palmer (2017) Funannotate: Fungal genome annotation scripts (<https://readthedocs.org/projects/funannotate/downloads/pdf/stable/>).
24. R. Laureau, S. Loeillet, F. Salinas, A. Bergström, P. Legoix-Né, G. Liti, A. Nicolas, Extensive recombination of a yeast diploid hybrid through meiotic reversion *Plos Genetics* 12(2): e1005781 (2016)
25. J. P. Lao *et al.*, Meiotic crossover control by concerted action of Rad51-Dmc1 in homolog template bias and robust homeostatic regulation. *Plos Genet* **9**, e1003978 (2013).
26. T. T. Woo, C. N. Chuang, M. Higashide, A. Shinohara, T. F. Wang, Dual roles of yeast Rad51 N-terminal domain in repairing DNA double-strand breaks. *Nucleic Acids Res* **48**, 8474-8489 (2020).
27. S. Kumar, G. Stecher, K. Tamura, MEGA7: Molecular evolutionary genetics analysis version 7.0 for Bigger Datasets. *Mol Biol Evol* **33**, 1870-1874 (2016).
28. C. H. Cheng *et al.*, SUMO modifications control assembly of synaptonemal complex and polycomplex in meiosis of *Saccharomyces cerevisiae*. *Genes Dev* **20**, 2067-2081 (2006).
